1 **Identification of leaf rust resistance loci in a geographically diverse panel of wheat using**  
2 **genome-wide association analysis**

3 Shivreet Kaur<sup>1†</sup>, Harsimardeep Gill<sup>2†</sup>, Matthew Breiland<sup>1</sup>, James Kolmer<sup>3</sup>, Rajeev Gupta<sup>4</sup>,  
4 Sunish Sehgal<sup>2\*</sup>, Upinder Gill<sup>1\*</sup>

5 <sup>1</sup>Department of Plant Pathology, North Dakota State University, Fargo, ND, USA

6 <sup>2</sup>Department of Agronomy, Horticulture and Plant Science, South Dakota State University,  
7 Brookings, SD, USA

8 <sup>3</sup>USDA-ARS Cereal Disease Laboratory, St. Paul, MN, USA

9 <sup>4</sup>USDA-ARS, Cereal Crops Research Unit, Edward T. Schafer Agricultural Research Center,  
10 Fargo, ND, USA

11 <sup>†</sup> These authors contributed equally to this work

12 \*Corresponding authors: Upinder Gill: [upinder.gill@ndsu.edu](mailto:upinder.gill@ndsu.edu); Sunish Sehgal:  
13 [sunish.sehgal@sdstate.edu](mailto:sunish.sehgal@sdstate.edu)

14 **Keywords:** leaf rust, *Puccinia triticina*, GWAS, seedling resistance, wheat, SNPs, QTLs, marker  
15 assisted selection

16 **Abstract**

17 Leaf rust, caused by *Puccinia triticina* (*Pt*) is among the most devastating diseases posing a  
18 significant threat to global wheat production. The continuously evolving virulent *Pt* races in  
19 North America calls for exploring new sources of leaf rust resistance. A diversity panel of 365  
20 bread wheat accessions selected from a worldwide population of landraces and cultivars was  
21 evaluated at the seedling stage against four *Pt* races (TDBJQ, TBBGS, MNPSD and, TNBJS). A  
22 wide distribution of seedling responses against the four *Pt* races was observed. Majority of the  
23 genotypes displayed a susceptible response with only 28 (9.8%), 59 (13.5%), 45 (12.5%), and 29  
24 (8.1%) wheat accessions exhibiting a highly resistant response to TDBJQ, TBBGS, MNPSD and,  
25 TNBJS, respectively. Further, we conducted a high-resolution multi-locus genome-wide  
26 association study (GWAS) using a set of 302,524 high-quality single nucleotide polymorphisms  
27 (SNPs). The GWAS analysis identified 27 marker-trait associations (MTAs) for leaf rust  
28 resistance on different wheat chromosomes of which 20 MTAs were found in the vicinity of  
29 known *Lr* genes, MTAs, or quantitative traits loci (QTLs) identified in previous studies. The  
30 remaining seven significant MTAs identified represent genomic regions that harbor potentially  
31 novel genes for leaf rust resistance. Furthermore, the candidate gene analysis for the significant  
32 MTAs identified various genes of interest that may be involved in disease resistance. The  
33 identified resistant lines and SNPs linked to the QTLs in this study will serve as valuable  
34 resources in wheat rust resistance breeding programs.

## 35 Introduction

36 Global wheat production is continuously constrained by the emergence of new and more virulent  
37 races of pathogens causing several economically important diseases. Among these, fungal  
38 pathogens are known to cause several important foliar diseases in wheat including three cereal  
39 rusts: leaf rust caused by *Puccinia triticina* (*Pt*), stem rust caused by *Puccinia graminis* f. sp.  
40 *tritici* (*Pgt*), and stripe rust caused by *Puccinia striiformis* f. sp. *tritici* (*Pst*). Wheat rusts threaten  
41 wheat production in the United States (US) by accounting for yield losses in the value of millions  
42 of dollars annually. Of the three wheat rusts, leaf rust (LR) is regarded as the most common,  
43 extensively distributed, and devastating disease causing 3.25% yield losses annually to global  
44 wheat production (Kolmer, 2005; Savary et al., 2019). The recurrent and across-the-board  
45 occurrence of leaf rust can lead to epidemic conditions with yield losses ranging from 15% to  
46 more than 50% when infections occur during early plant growth stages on susceptible cultivars  
47 (Singh et al., 2002; Huerta-Espino et al., 2011). Serious yield losses are incurred in terms of  
48 reduced kernels per head and decreased kernel weight (Bolton et al., 2008). In the US alone,  
49 ~40-60 races of *Pt* are reported annually (Kolmer et al., 2007) and yield losses valued at \$350  
50 million were reported between 2000 and 2004 (Huerta-Espino et al., 2011).

51 Host resistance is the most efficient and cost-effective strategy to manage leaf rust and wheat  
52 breeding programs throughout the world are deploying rust resistance genes in commercial  
53 cultivars to fight against this disease (Gill et al., 2019). Around 80 leaf rust resistance (*Lr*) genes  
54 have been identified and cataloged in wheat till date (Prasad et al., 2020). Of the identified genes,  
55 eleven *Lr* genes have been cloned, viz. *Lr1* (Cloutier et al., 2007), *Lr9* (Wang et al., 2022), *Lr10*  
56 (Feuillet et al., 2003), *Lr13* (Hewitt et al., 2021; Yan et al., 2021), *Lr14a* (Kolodziej et al., 2021),  
57 *Lr21* (Huang et al., 2003), *Lr22a* (Thind et al., 2017), *Lr34* (Krattinger et al., 2009), *Lr42* (Lin et  
58 al., 2022), *Lr58* (Wang et al., 2022), and *Lr67* (Moore et al., 2015). Genetic resistance can be  
59 classified into two categories, namely seedling/all-stage resistance (ASR) and adult plant  
60 resistance (APR). The seedling resistance is largely qualitative resistance usually controlled by a  
61 single major gene, effective at all the developmental stages of the plant life cycle. ASR is  
62 associated with a hypersensitive response, a programmed cell death that restricts the pathogen  
63 growth and spread. The majority of the studied and characterized leaf rust resistance genes are  
64 seedling resistance genes, with *Lr76* (Bansal et al., 2017), *Lr79* (Qureshi et al., 2018) and *Lr80*  
65 (Kumar et al., 2021b) being the recent additions to this group. On the other hand, non-race  
66 specific, adult-plant resistance (APR) is often partial resistance at the adult plant stage controlled  
67 by multiple minor-effect genes with an additive effect and only a sizable proportion of the  
68 identified *Lr* genes belong to this category. Among the characterized *Lr* genes, *Lr34* (Dyck,  
69 1987), *Lr46* (Singh et al., 1998), and *Lr67* (Hiebert et al., 2010) are broad-spectrum APR genes,  
70 providing partial resistance against all three wheat rusts and powdery mildew (*Blumeria*  
71 *graminis* f. sp. *tritici*). In addition to these genes, *Lr68* (Herrera-Foessel et al., 2012), *Lr74*  
72 (Chhetri et al., 2016), *Lr77* (Kolmer et al., 2018b), and *Lr78* (Kolmer et al., 2018a) have also  
73 been characterized in hexaploid wheat as APR genes against leaf rust. The race-specific *Lr* genes  
74 provide resistance against specific races but the continuously evolving virulent pathogen races  
75 render these genes ineffective. Thus, it is important to find novel sources of leaf rust resistance  
76 that offer resistance to many different leaf rust races in order to improve the overall durability of  
77 resistance in released wheat cultivars.

78 The recent advancements in sequencing approaches and harmonized community efforts have  
79 made genome-wide association studies (GWAS) as an important method for studying the  
80 marker-trait associations (Zhu et al., 2008; Tibbs Cortes et al., 2021). In contrast to bi-parental  
81 linkage mapping, GWAS extensively utilizes the ancient recombination events that occurred in  
82 natural populations for the identification of genomic regions associated with traits of interest. In  
83 wheat, GWAS has been used successfully for dissecting the genetic basis of agronomic traits  
84 (Sukumaran et al., 2014; Gao et al., 2015; Ward et al., 2019; Sidhu et al., 2020), disease  
85 resistance (Gyawali et al., 2018; Phan et al., 2018; Zhu et al., 2020; AlTameemi et al., 2021),  
86 quality traits (Kristensen et al., 2018; Chen et al., 2019; Yang et al., 2020) and insect resistance  
87 (Joukhadar et al., 2013; Mondal et al., 2016).

88 In the Great Plains region of the US, leaf rust is the most prevalent rust disease. The hard red  
89 spring wheat cultivars grown in the northern plains have resistance genes that include *Lr2a*,  
90 *Lr10*, *Lr16*, *Lr21*, *Lr23*, and *Lr34* (Kolmer, 2019). However, the effectiveness of some of these  
91 genes has been reduced due to the continuous emergence of new virulent pathogen races. For  
92 example, *Lr21* had been deployed for leaf rust resistance since the mid-2000s and is found in  
93 some hard red spring cultivars like Glenn, Faller, and RB07. However, virulent races against this  
94 gene have been identified in North Dakota and Minnesota ([https://www.ars.usda.gov/midwest-  
95 area/stpaul/cereal-disease-lab/docs/lr21-virulence-detected/](https://www.ars.usda.gov/midwest-area/stpaul/cereal-disease-lab/docs/lr21-virulence-detected/)). Thus, exploring and identifying  
96 new resistance sources is highly needed. In the current study, a highly diverse panel of bread  
97 wheat accessions from different regions of the world was evaluated for ASR against leaf rust  
98 races prevalent in the Northern Great Plains of the US. A high-resolution multi-locus GWAS  
99 was also performed to identify genomic regions associated with LR resistance to facilitate the  
100 development of resistant wheat cultivars for the future.

## 101 **Materials and Methods**

### 102 **Plant material and *P. triticina* races**

103 We used a diverse panel of 365 hexaploid wheat accessions, including landraces and cultivars  
104 from different regions of the world (Supplementary Table S1). The 365 accessions were selected  
105 from a larger collection of 890 diverse accessions of hexaploid and tetraploid wheat that was  
106 previously resequenced using the sequence capture assay (He et al., 2019). The accessions were  
107 obtained from the USDA National Small Grains Collection gene bank and grown for one round  
108 of purification and seed increase. The metadata for the 365 accessions can be found in the online  
109 repository (<http://wheatgenomics.plantpath.ksu.edu/1000EC>). Four prevalent *Pt* races (TDBJQ,  
110 TBBGS, MNPSD, TNBJS) in the Northern Great Plains of the US were selected for screening  
111 the wheat lines at the seedling stage. TBBGS (virulent on genes *Lr1*, *Lr2a*, *Lr2c*, *Lr3*, *Lr10*,  
112 *Lr21*, *Lr28*, and *Lr39*) was the most predominant race in Minnesota, North Dakota, and South  
113 Dakota in 2020. Furthermore, MNPSD (virulent on genes *Lr1*, *Lr3*, *Lr9*, *Lr24*, *Lr3ka*, *Lr17*,  
114 *Lr30*, *LrB*, *Lr10*, *Lr14a*, and *Lr39*), TNBJS (virulent on genes *Lr1*, *Lr2a*, *Lr2c*, *Lr3*, *Lr9*, *Lr24*,  
115 *Lr10*, *Lr14a*, *Lr21*, *Lr28*, and *Lr39*) and TDBJQ (virulent on genes *Lr1*, *Lr2a*, *Lr2c*, *Lr3*, *Lr24*,  
116 *Lr10*, *Lr14a*, *Lr21*, and *Lr28*) are the other important races in the region.

117

### 118 **Phenotyping assays for leaf rust seedling screening**

119 The 365 wheat accessions were evaluated in two independent experiments for seedling response  
120 to LR. For the leaf rust screening, wheat seedlings at the two-leaf stage were evaluated for their  
121 reactions to described races in the biosafety level 2 (BSL 2) facility at Dalrymple Research  
122 Greenhouse Complex, North Dakota Agricultural Experiment Station (AES), Fargo. Briefly, five  
123 seedlings per each accession along with susceptible checks were used for phenotypic screening  
124 for each LR race. Plants were grown in a 50-cell tray containing PRO-MIX LP-15  
125 (www.pthorticulture.com) sterilized soil mix and maintained in a rust-free greenhouse growth  
126 room set to 22°C/18°C (day/night) with 16 h/8 h day/night photoperiod. At two-leaf stage, the  
127 seedlings were inoculated with fresh urediniospores suspended in SOLTROL-170 mineral oil  
128 (Philips Petroleum) at a final concentration of  $10^5$  spores mL<sup>-1</sup> using an inoculator pressurized by  
129 an air pump. The inoculated seedlings were placed in a dark dew chamber at 20°C overnight and  
130 then transferred back to the growth room. The infection types (IT) were scored about 12 to 14  
131 days after inoculation, using 0-4 scale, where '0' = no visible uredinia, ';' = hypersensitive flecks,  
132 '1' = small uredinia with necrosis, '2' = small to medium-sized uredinia with green islands and  
133 surrounded by necrosis or chlorosis, '3' = medium-sized uredinia with or without chlorosis, '4' =  
134 large uredinia without chlorosis (Stakman et al., 1962). For each IT, '+' or '-' was used to  
135 represent variations from the predominant type. A '/' was used for separating the heterogeneous  
136 IT scores between leaves with the most prevalent IT listed first. For plants with different ITs  
137 within leaves, a range of IT was recorded with the most predominant IT was listed first. The IT  
138 scores were converted to a 0-9 linearized scale referred as infection response (IR) (Zhang et al.,  
139 2014). Genotypes with linearized IR scores of 0-4 were considered as highly resistant, 5-6 as  
140 moderately resistant, and 7-9 as susceptible.

141

## 142 Phenotypic data analysis

143 Phenotypic data were analyzed as described previously in (Gill et al., 2021). In brief, a mixed  
144 model analysis was used to obtain the best linear unbiased estimates (BLUEs) for phenotypic  
145 responses from each of the four isolates using following equation:

$$146 \quad y_{ij} = \mu + R_i + G_j + e_{ij}$$

147 where  $y_{ij}$  is the trait of interest,  $\mu$  is the overall mean,  $R_i$  is the effect of the  $i^{\text{th}}$  independent  
148 replicate/experiment,  $G_j$  is the effect of the  $j^{\text{th}}$  genotype, and  $e_{ij}$  is the residual error effect  
149 associated with the  $i^{\text{th}}$  replication, and  $j^{\text{th}}$  genotype. The broad-sense heritability ( $H^2$ ) for IR was  
150 estimated for independent nurseries as follows:

$$H^2 = \frac{\sigma_g^2}{\sigma_g^2 + \sigma_e^2 / nRep}$$

151 where  $\sigma_g^2$  and  $\sigma_e^2$  are the genotype and error variance components, respectively. The linear  
152 mixed model analysis was performed in META-R (Alvarado et al., 2020) based on the 'LME4'  
153 R-package (Bates et al., 2015) for the heritability estimation. The Pearson's correlations among  
154 the phenotype responses from four races were estimated based on the BLUEs for each trait using  
155 'psych' package in R environment (R Core Team, 2018). The visualization of descriptive  
156 statistics was performed using R package 'ggplot2' (Wickham, 2016).

157

## 158 **Genotyping, population structure, and linkage disequilibrium**

159 The 365 accessions used in the current study were previously sequenced using the exome  
160 sequence capture assay, resulting in the identification of around 7.3 million SNPs (He et al.,  
161 2019). A VCF file containing a filtered set of about 3 million SNPs ([http://](http://wheatgenomics.plantpath.ksu.edu/1000EC)  
162 [wheatgenomics.plantpath.ksu.edu/1000EC](http://wheatgenomics.plantpath.ksu.edu/1000EC)) was used to extract the genotyping information. The  
163 extracted genotyping data was subjected to quality control by removing the sites with > 75%  
164 missing data, > 5% heterozygotes, and < 5% minimum allele frequency (MAF), leaving 302,524  
165 high-quality SNPs for downstream analysis. The missing genotypes from selected SNPs were  
166 imputed by Beagle v4.1 (beagle.27Jan18.7e1.jar;  
167 [https://faculty.washington.edu/browning/beagle/b4\\_1.html](https://faculty.washington.edu/browning/beagle/b4_1.html)) (Browning and Browning, 2007)  
168 using parameters defined earlier (He et al., 2019) and the imputed set of 302,524 SNPs was used  
169 to perform GWAS.

170 Further, population structure and linkage disequilibrium (LD) analyses were performed using a  
171 pruned set of 14,185 SNPs. The LD-based pruning ( $r^2 > 0.2$ ) was performed in PLINK v1.90  
172 using ‘indep-pairwise’ function (Purcell et al., 2007). The population stratification was assessed  
173 using parallel iterations of a Bayesian model-based clustering algorithms STRUCTURE v2.3.4  
174 (Pritchard et al., 2000; Chhatre and Emerson, 2017) assuming ten fixed populations ( $K = 1-10$ )  
175 with ten independent runs for each  $K$  using a burn-in period of 10,000 iterations followed by  
176 10,000 Monte-Carlo iterations. The optimal value of  $K$  was identified using STRUCTURE  
177 HARVESTER v0.6.9, which is based on an ad-hoc statistic-based approach (Evanno et al., 2005;  
178 Earl and vonHoldt, 2012). Further, the principal component analysis (PCA) was performed using  
179 14,185 SNPs with R package ‘SNPRelate’ (Zheng et al., 2012). The first two principal  
180 components were plotted as a scatterplot to observe any stratification based on various factors  
181 using R package ‘ggplot2’ (Wickham, 2016). The linkage disequilibrium (LD) between SNPs  
182 was assessed as the squared correlation coefficient ( $r^2$ ) of alleles. The LD decay distance was  
183 estimated and visualized for the whole genome and individual sub-genomes using ‘PopLDdecay’  
184 program (Zhang et al., 2019a).

## 185 **Marker-trait associations**

186 Genome-wide association analyses were performed using a panel of 365 accessions with  
187 3,02,524 high-quality SNPs to identify marker-trait associations for reaction to four *Pt* isolates  
188 (Table S6). Initially, we used two different GWAS algorithms, including the mixed linear model  
189 (MLM) (Yu et al., 2006) and a Fixed and random model Circulating Probability Unification  
190 (FarmCPU) (Liu et al., 2016). The quantile-quantile (QQ) plots were used to compare the two  
191 algorithms that revealed that FarmCPU showed better control of false positives and false  
192 negatives. Hence, FarmCPU was used to report GWAS results for all four isolates. In brief,  
193 FarmCPU is an improved multiple-locus model that controls false positives by fitting the  
194 associated markers detected from the iterations as cofactors to perform marker tests within a  
195 fixed-effect model. The FarmCPU was implemented through Genomic Association and  
196 Prediction Integrated Tool (GAPIT) version 3.0 in the R environment (Wang and Zhang, 2021),  
197 and the first two principal components were included to account for the population structure  
198 based upon visual examination of the scree plot and DeltaK statistic from STRUCTURE

199 analysis. The Bonferroni correction-based threshold to declare an association as significant  
200 generally proves too stringent as it accounts for all the SNPs in the dataset rather than  
201 independent tests. Thus, most studies rely on an exploratory threshold or a corrected Bonferroni  
202 threshold based on independent tests (Halder et al., 2019; Pang et al., 2020; Kumar et al., 2021a).  
203 In our case, we used an exploratory threshold of  $-\log_{10}(P) = 5.00$  which is strict compared to the  
204 commonly used threshold of  $-\log_{10}(P) = 3.00$  and suitable for a multi-locus model, which  
205 generally does not require multiple corrections (Zhang et al., 2019b). Furthermore, we evaluated  
206 the effect of the accumulation of resistant alleles for significant marker-trait associations (MTAs)  
207 on the phenotypic performance of the genotypes. The panel of 365 accessions was grouped based  
208 on the number of resistant alleles for significant MTAs carried by each accession. These groups  
209 were compared using an pairwise t-test to assess the additive effect of the resistant alleles on the  
210 disease reaction of respective isolates.

## 211 **Candidate gene analysis**

212 The candidate gene analysis was performed for selected stable MTAs to identify the putative  
213 candidate genes. As the SNPs were physically mapped to Chinese Spring RefSeq v1.0, we used  
214 IWGSC Functional Annotation v1.0 to retrieve high-confidence genes within +/- 1Mbp of the  
215 significant MTAs. The wheat gene expression browser (<http://www.wheat-expression.com/>)  
216 (Borrill et al., 2016) and a thorough review of the literature was used to exclude unlikely genes  
217 from the candidate regions.

## 218 **Results**

### 219 **Phenotypic response of hexaploid wheat accessions to leaf rust**

220 To identify new sources of leaf rust resistance, a panel of 365 hexaploid wheat accessions was  
221 phenotypically characterized at the seedling stage with the four *Pt* races. The panel displayed  
222 large variations for the disease score ranging from immune response (IT = 0, IR = 0) to highly  
223 susceptible response (IT = 4, IR = 9) (Figure 1; Tables 1 and 2). The mean linearized infection  
224 response scores of the wheat genotypes were 6.4, 6.3, 5.4, and 6.3 for *Pt* races TDBJQ, TBBGS,  
225 MNPSD, and, TNBJS, respectively (Table 1). The distributions of infection responses for all  
226 races except MNPSD were skewed towards susceptible scores (IR >7). About 45-50% of the  
227 lines displayed susceptible reactions against TDBJQ, TBBGS and, TNBJS, whereas only 12.7%  
228 of lines were susceptible to MNPSD with majority of the lines exhibiting a moderately resistance  
229 response (Figure 1, Table 2). A total of 28 (9.8%), 59 (13.5%), 45 (12.5%) and 29 (8.1%) wheat  
230 lines were highly resistant to TDBJQ, TBBGS, MNPSD and, TNBJS, respectively (Table 2).  
231 Majority of the resistant accessions against these *Pt* races were from the Americas followed by  
232 Europe, Asia and Africa (Supplementary Table S5). Individually, TDBJQ, TBBGS, MNPSD,  
233 and TNBJS had 30.5%, 29%, 28.6%, and 36.7% accessions from the Americas (Supplementary  
234 Table S5). Further, there were 71 (19.5%) lines that displayed a resistance response (IR ≤6)  
235 against all four races (Supplementary Table S6). Out of these 71 resistant accessions, 18.3%  
236 were of North American origin (Supplementary Table S6). The proportion of lines showing  
237 resistance ranged from 21.4% to 27.9% for the combination of three races and 29.9% to 46.6%  
238 for the combination of two races (Table 3). Positive but weak correlations were observed among  
239 the seedling plant infection responses to the four *Pt* races and Pearson's *r* value ranged from 0.16  
240 to 0.39 (Supplementary Figure S1). The broad-sense heritability of infection response for the *Pt*

241 races was high (0.8), showing a large portion of phenotypic variation being explained by the  
242 genotypic component (Table 1).

### 243 **Population structure and linkage disequilibrium analysis**

244 The STRUCTURE analysis used to infer the population structure revealed two major  
245 subpopulations (P1 and P2 hereafter) in the panel of 365 accessions based on the peak of DeltaK  
246 statistic (Figure 2a). The subpopulation P1 comprised 82 accessions while P2 was comparatively  
247 larger comprising the remaining 283 accessions. Further, we assessed a relationship between the  
248 two subpopulations and various characteristics including geographic origin, type, and growth  
249 habit of the studied accessions. The subpopulation P1 mostly represented the spring wheat  
250 accessions as 78 of the 82 accessions had spring growth habit. In contrast, the subpopulation P2  
251 comprised accessions with both spring (216), winter (53), and facultative (14) growth habits.  
252 Additionally, P1 mainly represented landraces (51) with comparatively few cultivars (15);  
253 whereas, P2 includes cultivated accessions with 144 cultivars and 69 landraces. Based on  
254 geographical origin, P1 includes accessions from Asia (45) and Africa (23) with a few accessions  
255 from Europe (3) and the Americas (7). In contrast, P2 includes majority of accessions from  
256 Europe (89) and the Americas (95) and a good number of accessions from Asia (40) and Africa  
257 (37).

258 The principal component analysis also revealed two subpopulations within the studied  
259 germplasm, with the first two principal components explaining a genetic variation of 4.7% and  
260 3.3%, respectively (Figures 2b and 2c). The first two principal components were plotted to  
261 visually differentiate the accessions by origin and growth habit. The PCA results showed a  
262 differentiation among the accessions belonging to landrace or cultivar categories (Figure 2c).  
263 However, we did not observe a clear differentiation based on growth habit and geographic origin  
264 (Supplementary Figure S2). The linkage disequilibrium (LD) decay was estimated based on LD  
265 value ( $r^2$ ) for the whole genome as well as individual sub-genomes. For the whole genome, the  
266 LD decay was found to be about 1.5 Mb (Supplementary Figure S3). The LD decay for the three  
267 sub-genomes A, B, and D revealed different patterns, with A and B showing smaller LD decay  
268 distances as compared to the D sub-genome (Supplementary Figure S3).

### 269 **Genome-Wide Association Analyses for leaf rust resistance**

270 The phenotypic data of *Pt* screening was subjected to GWAS to identify genomic regions and  
271 SNP markers associated with leaf rust resistance. The GWAS was performed using BLUEs  
272 calculated from disease scores data for individual *Pt* races. We identified a total of 27 significant  
273 MTAs on twelve chromosomes: 1A, 1B, 2A, 2B, 2D, 3B, 4A, 4B, 4D, 5A, 5B, and 6B for  
274 response against the four *Pt* races. Individually, we detected nine, nine, one, and eight significant  
275 MTAs for responses against races MNPSD, TBBGS, TDBJQ, and TNBJS, respectively (Figure  
276 3, Table 4). The nine MTAs for race MNPSD were identified on eight different chromosomes  
277 including 1A, 2B, 2D, 3B, 4A, 4B, 5A, and 5B (Figure 3, Table 4). The most significant MTA  
278 for MNPSD (*scaffold9496\_550027*;  $-\log_{10}P = 11.5$ ) was observed on chromosome 3B physically  
279 mapped to 456 Mb and had a SNP effect of 0.91 (Table 4). For response against TBBGS, a total  
280 of nine MTAs were identified on seven different chromosomes: 1B, 2A, 3B, 4B, 5A, 5B, and 6B  
281 (Figure 3, Table 4). Of note, the MTAs *scaffold145719\_3415472*, *scaffold20863\_2950181*, and  
282 *scaffold81142-6\_3121151* identified on chromosome 1B, 2A, and 5B showed a significant effect



283 value of -0.81, 0.66, and -0.80, respectively. Further, eight significant MTAs were detected for  
284 TNBJS mapped on six different chromosomes including 1A, 1B, 2B, 2D, 3B, and 4A (Figure 3,  
285 Table 4). Among these eight MTAs, the most significant MTA (*scaffold63719\_1362898*) was  
286 identified on chromosome 4A at 625 Mb and had a SNP effect value of 0.81. In contrast to the  
287 other races, we identified only one MTA (*scaffold38811\_1402219*) for isolate TDBJQ mapped at  
288 503 Mb on chromosome 4D (Figure 3, Table 4).

289 Furthermore, we evaluated the additive effect of resistant alleles of significant MTAs on mean  
290 infection response from individual races. As we identified only one MTA for TDBJQ, data from  
291 only three races were used for this analysis. Overall, we observed a significant negative  
292 association between the number of resistant alleles and infection response for all three races  
293 suggesting that the accumulation of resistant alleles in genotypes reduces infection response  
294 (Figure 4). The accessions with two or more resistant alleles exhibited a lower infection response  
295 against all individual races.

### 296 **Candidate gene analysis for significant marker-trait associations**

297 The significant MTAs were further analyzed to identify candidate genes underneath or in close  
298 vicinity of the MTAs in the wheat genome. Among the 27 MTAs, 20 were mapped in the  
299 proximity of previously reported MTAs, QTLs or genes for LR resistance, validating the  
300 importance of these regions. Thus, we selected these regions for identifying putative genes of  
301 interest that may play a role in LR resistance. Further, we investigated the local LD decay in  
302 these 20 regions by constructing haplotype blocks. Out of the 20 regions, LD decay rate was  
303 found to be less than 1Mbp in 17 regions (data not shown). Henceforth, a 1Mbp window around  
304 the associated SNP was used to retrieve high-confidence genes using CS RefSeq v1.1. In total,  
305 we identified 252 high confidence (HC) genes in +/- 1 Mb of the significant MTAs  
306 (Supplementary Table S8). Further, a thorough comparison with literature identified genes of  
307 interest that encode known plant disease resistance proteins such as intracellular nucleotide-  
308 binding and leucine-rich repeat (NLR) receptors, proteins with kinase domains, ATP-binding  
309 cassette (ABC) transporters, F-box-like domain-containing proteins, defensins, receptor kinase  
310 proteins, and others (Supplementary Table S9).

### 311 **Discussion**

312 Wheat germplasm collections serve as major resources for enriching the wheat genetic diversity  
313 against various biotic and abiotic stresses including pathogens such as rusts. Utilizing the  
314 untapped value of these genetic repositories can help identify potential novel sources of genes  
315 and QTLs and thereby advance the course of broadening the resistance diversity against leaf rust.  
316 Association studies have been successfully deployed in both bread wheat and durum wheat for  
317 detecting genomic regions associated with leaf rust resistance at seedling and adult plant stages  
318 (Aoun et al., 2016, 2021; Gao et al., 2016; Li et al., 2016; Sapkota et al., 2019; Leonova et al.,  
319 2020). Foliar diseases of wheat like leaf rust are among the most important and destructive  
320 diseases in the Northern Great Plains of the US. Identifying novel sources of resistance against  
321 leaf rust is a continuing challenge due to the constant evolution of *Pt* populations causing the  
322 resistance breakdown of the existing *Lr* genes. In 2020, 15 virulence phenotypes were identified  
323 from 140 isolates in North Dakota, Minnesota, and South Dakota with TBBGS (42.1%),  
324 MNPSD (17.9%), and TNBJS (5.7%) being the most predominant phenotypes

325 ([https://www.ars.usda.gov/midwest-area/stpaul/cereal-disease-lab/docs/cereal-rusts/race-](https://www.ars.usda.gov/midwest-area/stpaul/cereal-disease-lab/docs/cereal-rusts/race-surveys/)  
326 [surveys/](https://www.ars.usda.gov/midwest-area/stpaul/cereal-disease-lab/docs/cereal-rusts/race-surveys/)). Therefore, we evaluated a global wheat diversity panel of 365 hexaploid wheat  
327 accessions for identifying genetic loci harboring novel resistance genes for leaf rust against four  
328 important and prevalent races namely, TDBJQ, TBBGS, MNPSD, and TNBJS, at the seedling  
329 stage.

330 Our phenotypic evaluations identified a substantial number of resistant accessions from both  
331 North and South America (Supplementary Table S5) against the *Pt* races. Further, we identified  
332 59 spring, 10 winter, and 2 facultative growth habit accessions out of the 71 resistant lines  
333 carrying race-specific resistance to all four *Pt* races that are prevalent in the north-central region  
334 of the United States (Supplementary Table S6). The majority of the accessions are cultivated  
335 lines from the Americas (38%) followed by Europe (25.3%), Asia (22.5%), and Africa (9.9%)  
336 (Supplementary Table S6). Leaf rust resistance in a sizeable proportion (18.3%) of North  
337 American lines could be due to their selection against *Pt* races predominant in North America.  
338 Similar results were reported by (Gao et al., 2016), where high resistance was observed in a sub-  
339 population consisting mostly North American lines when screened against multiple *Pt* races  
340 common in that region. The resistance response to *Pt* races, TNBJS and TBBGS showed a  
341 slightly higher correlation (0.39) (Supplementary Figure S1) as compared to the other races  
342 which could be due to the similarities in the virulence profile as both races are virulent on *Lr1*,  
343 *Lr2a*, *Lr2c*, *Lr3*, *Lr10*, *Lr21*, *Lr28*, and *Lr39*. Out of the 71 resistant lines, 10 wheat accessions  
344 displayed a highly resistant response (IR ≤ 4) against a combination of three different races, and  
345 only 3 lines were highly resistant (IR ≤ 4) against all four races (Supplementary Table S6).  
346 These lines may contain one or more existing or novel genes and can serve as a potential source  
347 for transferring this resistance into wheat cultivars by the breeding programs.

348 GWAS with FarmCPU algorithm identified 27 MTAs for leaf rust resistance on the eleven wheat  
349 chromosomes (Table 4). The BLUEs were not normally distributed, so we tried BoxCox  
350 transformation to normalize the data. However, the transformation did not improve the  
351 distribution of BLUEs (Supplementary Figure S4), hence we used non-transformed data for  
352 performing GWAS. Out of 27 MTAs, 20 were identified in the vicinity of previously reported  
353 genes, MTAs, or QTLs associated with leaf rust resistance. An important MTA  
354 (*scaffold33664\_2059905*) was identified for LR resistance against TBBGS which mapped  
355 around 4 Mb on the short arm of chromosome 2A. Interestingly, this region (0.5 – 7.8 Mb) has  
356 been reported to harbor three known *Lr* genes including *Lr17* (Dyck and Kerber, 1977), *Lr37*  
357 (Bariana and McIntosh, 1993; Blaszczyk et al., 2004), and *Lr65* (Wang et al., 2010; Mohler et  
358 al., 2012; Zhang et al. 2021a), and a recently identified QTL for LR resistance (Fatima et al.,  
359 2020) (Supplementary Table S7). A long chromosomal fragment of 25-38 cM containing *Lr37*,  
360 *Yr17*, and *Sr38* was introduced from a wild wheat relative *Aegilops ventricosa* and located on a  
361 2NS/2AS translocation in a winter wheat cultivar ‘VPM1’ (Bariana and McIntosh, 1993). *Lr37* is  
362 an adult plant resistance gene but expresses a seedling resistance response of 2+ at temperatures  
363 below 20 °C (Park and McIntosh, 1994; Kolmer, 1996). Recently this segment was also found to  
364 provide resistance against wheat blast. In addition to *Lr37*, this MTA (*scaffold33664\_2059905*)  
365 colocalized with *WMS636* (4.9 Mb), a distal flanking marker associated with genes *Lr17a*  
366 (Bremenkamp & Barrett et al., 2008) and the two markers, *AltID-11* (0.55Mb) and *Alt-92* (0.61Mb),  
367 flanking *Lr65* (Zhang et al. 2021b). Since TBBGS is avirulent against *Lr65* and the identified  
368 MTA colocalized with markers tightly linked to *Lr65*, it is highly likely that the locus identified  
369 in this study is identical to the *Lr65* locus. Zhang et al. (2021b) identified *TraesCS2A02G001500*

370 encoding NB-ARC and LRR domains as the most prominent candidate gene for *Lr65*. On  
371 chromosome 4B, we identified an MTA (*scaffold73828-3\_704067*) associated with response to  
372 TBBGS in the vicinity of two known *Lr* genes, *Lr12* (Dyck et al., 1966) and *Lr31* (Singh and  
373 McIntosh, 1984). *Lr12* is a race specific adult plant resistance gene and is completely linked or  
374 identical to *Lr31* which is a seedling resistance gene that requires another complementary gene  
375 *Lr27/Sr2/Yr30* to function (Singh and McIntosh, 1984; Singh et al., 1999; Mago et al., 2011;  
376 Singh and Bowden, 2011). However, we did not identify any association in the 3BS region  
377 harboring *Lr27* in this study.

378 Three MTAs (*scaffold35219\_1114450*, *scaffold145719\_3415472* and *scaffold33401\_3398330*)  
379 were identified on chromosome 1B against TBBGS and TNBJS. Two known *Lr* genes, *Lr33*  
380 (Dyck, 1987) and *Lr75* (Singla et al., 2017) were previously mapped on chromosome 1B. *Lr75* is  
381 an adult plant resistance gene and was first identified in the Swiss cultivar ‘Forno’ (Schnurbusch  
382 et al., 2004; Singla et al., 2017). The physical position of *scaffold145719\_3415472*  
383 approximately co-localized with the physical location of *GWM604*, a distal flanking marker  
384 linked to *Lr75* on CS RefSeq v1.0 (Singla et al., 2017). Given that the *scaffold145719\_3415472*  
385 was identified for seedling resistance to LR, it is unlikely that this MTA represents *Lr75*.  
386 Another MTA on chromosome 1B (*scaffold33401\_3398330*) was mapped 9.2 Mb apart from a  
387 diagnostic marker (*BOBWHITE\_C39153\_131*) linked to *Lr33* (Che et al., 2019). Interestingly,  
388 *scaffold35219\_1114450*, *scaffold145719\_3415472* and *scaffold33401\_3398330* were mapped  
389 within 1 Mb of several previously reported MTAs (*IAAV8117*, *BS00083533\_51*, and  
390 *BS00084722\_51*) for leaf and stripe rust resistance (Zhang et al., 2021a) validating their role in  
391 response to *Pt* (Supplementary Table S7).

392 We identified two MTAs (*scaffold56230\_857271* and *scaffold98508-7\_1879233*) for race  
393 TNBJS on chromosome 2BL close to *WMS382*, a marker associated with *Lr50* (Brown-Guedira  
394 et al., 2003). *Lr50* was transferred from wild wheat, *T. timopheevi armeniacum* and was  
395 previously mapped on chromosome 2BL (Brown-Guedira et al., 2003). Furthermore,  
396 *scaffold56230\_857271*, and *scaffold98508-7\_1879233* on 2BL mapped in close vicinity of  
397 previously reported MTAs (*AX-95006189* and *AX-94481202*) for LR resistance (Kumar et al.,  
398 2020). Another MTA, *scaffold151621\_1347043* was mapped in the vicinity of a recently  
399 reported MTA (*AX-94671785*) for LR resistance (Vikas et al., 2022) (Supplementary Table S7).

400 In response to MNPSD, we detected an MTA (*scaffold109282\_20590799*) which mapped on  
401 chromosome 2D near *WPT-0330*, a marker linked to a seedling resistance gene, *Lr2* (Tsilo et  
402 al., 2014; Dyck and Samborski, 1974). Similarly, *scaffold81325\_356781* on chromosome 5B  
403 mapped ~ 8 Mbp apart from marker *BOBWHITE\_REP\_C50349\_139* (Carpenter et al., 2017),  
404 which is linked to *Lr18* (Dyck and Samborski, 1968). Further studies are needed to determine the  
405 relationship between the identified MTAs and the postulated *Lr* genes in close proximity to  
406 MTAs. Joukhadar et al. (2020) conducted a GWAS study using 2,300 hexaploid wheat  
407 genotypes including worldwide landraces, cultivars and synthetic backcross derivatives for adult  
408 plant resistance to leaf rust, stripe and stem rust across multiple Australian environments. Of the  
409 365 wheat accessions used in our study, 257 genotypes overlapped with the adult plant screening  
410 panel (Joukhadar et al., 2020); interestingly no common resistant lines and significant marker-  
411 trait associations for leaf rust were found among the two studies.

412 In addition, our analyses also identified two novel MTAs (*scaffold9496\_550027* and  
413 *scaffold57658-1\_2072073*) that were located in genomic regions where no previously reported  
414 *Lr* genes or MTAs have been reported in wheat (Supplementary Table S7). Further, we also  
415 identified five putatively novel MTAs (*scaffold33098\_3932746*, *scaffold57495\_4340875*,  
416 *scaffold163140-5\_613860*, *scaffold151621\_1347043*, and *scaffold56230\_857271*) mapped at  
417 >10 Mb apart from the previously reported MTAs in various GWAS studies (Supplementary  
418 Table S7). A total of three, one, and three significant novel MTAs were identified for resistance  
419 against MNPSD, TBBGS, and TNBJS, respectively. One of these seven MTAs,  
420 *scaffold57495\_4340875*, detected on chromosome 2B was found near *Lr35*, (Kerber and Dyck,  
421 1990) an APR gene expressing at two-leaf stage. *BCD260* (Seyfarth et al., 1999), a marker  
422 linked to the *Lr35*, was about 30 Mb apart *scaffold57495\_4340875*. Given *Lr35* confers APR and  
423 the associated marker is far away from the identified MTA, it is unlikely the same locus. Another  
424 MTA, *scaffold163140-5\_613860* against race TNBJS was mapped on the region harboring  
425 known gene *Lr28* (McIntosh et al. 1982) on chromosome 4A. However, TNBJS is virulent on  
426 *Lr28* which eliminates the possibility of association of *Lr28* with *scaffold163140-5\_613860*.  
427 Further, *scaffold163140-5\_613860* was also mapped in the vicinity of a recently reported MTA  
428 (*AX-95106749*) for adult plant LR resistance (Vikas et al., 2022). Since, *scaffold163140-*  
429 *5\_613860* was identified for seedling resistance to LR, it is unlikely that this MTA represents  
430 *AX-95106749*. Similarly, *scaffold56230\_857271*, *scaffold151621\_1347043*, and  
431 *scaffold33098\_3932746*, identified on chromosomes 2B, 3B, and 5B represent a novel locus  
432 associated with TNBJS and MNPSD respectively, as no previously reported *Lr* gene has been  
433 detected in this region.

434 Next, we selected 17 significant MTAs based on LD decay rate of less than 1Mbp to identify  
435 candidate genes with putative role in disease resistance (Supplementary Tables S8 and S9). The  
436 putative candidate genes belonged to different disease resistance encoding gene families such as  
437 leucine-rich repeats receptor-like kinases (LRR-RLKs), nucleotide-binding site leucine-rich  
438 repeats (NBS-LRRs), serine/threonine-protein phosphatase domain containing proteins, ABC  
439 transporters, zinc finger proteins, and others (Supplementary Table S9). Zinc finger domains  
440 have been identified in various disease resistance genes from several crops, indicating their  
441 significant role in conferring host-plant resistance (Epple et al., 2003; Ciftci-Yilmaz and Mittler,  
442 2008; Emerson and Thomas, 2009). Further, serine/threonine-protein phosphatase domain  
443 containing proteins are known to be involved in regulation of plant defense and stress responses  
444 (País et al., 2009; Máthé et al., 2019). LRR-RLKs and ABC transporters have known to be  
445 involved in a wide variety of developmental and defense-related processes (Torii, 2004;  
446 Krattinger et al., 2009; Kang et al., 2011). Additionally, a few more genes encoding putative  
447 proteins of interest including plant defensins, germin-like proteins, E3 ubiquitin-protein ligase,  
448 cytochrome P450 family protein, F-box proteins (FBPs), and others were identified  
449 (Supplementary Tables S8 and S9). These identified genes could serve as valuable information in  
450 future gene cloning efforts of these genomic regions.

451 In conclusion, we identified valuable sources of LR resistance against multiple *Pt* races. The  
452 SNP markers reported as associated with resistance can facilitate the deployment of these QTLs  
453 through marker-assisted selection in breeding programmes.

#### 454 **Acknowledgments**

455 The authors would like to thank Julie Hochhalter for providing the greenhouse resources at  
456 Dalrymple Research Greenhouse complex at Fargo, ND.

#### 457 **Funding**

458 This project was collectively supported by the USDA National Institute of Food and Agriculture,  
459 Hatch project number ND02243 and the USDA Agriculture and Food Research Initiative  
460 Competitive Grants 2022-68013-36439 (Wheat-CAP) from the USDA National Institute of Food  
461 and Agriculture. The funders had no role in the study design, data collection, analysis, decision  
462 to publish, or manuscript preparation.

#### 463 **Author Contributions**

464 UG and SKS conceptualized the experiment and designed the methodology; SK, and UG  
465 performed the investigation; SK and HG performed the data curation, data analysis, and  
466 visualization; SK and HG performed the software implementation; SK, HG, SKS, and UG wrote  
467 the original manuscript; SK, HG, JK, RG, SKS, and UG contributed to the interpretation of  
468 results; All the authors contributed to manuscript revision and approved the final manuscript.

#### 469 **Conflicts of Interest**

470 The authors declare that the research was conducted in the absence of any commercial or  
471 financial relationships that could be construed as a potential conflict of interest.

#### 472 **Ethical approval**

473 The authors declare that the experiments comply with the current laws of the country.

#### 474 **Supplementary Information (SI)**

475 The Supplementary information cited in the manuscript can be found in an attached PDF  
476 document.

477

478

479

480

481

482

483

484

## 485 **References**

- 486 ALTameemi, R., Gill, H. S., Ali, S., Ayana, G., Halder, J., Sidhu, J. S., et al. (2021). Genome-  
487 wide association analysis permits characterization of *Stagonospora nodorum* blotch (SNB)  
488 resistance in hard winter wheat. *Sci. Rep.* 11:12570. doi: 10.1038/s41598-021-91515-6.
- 489 Alvarado, G., Rodríguez, F. M., Pacheco, A., Burgueño, J., Crossa, J., Vargas, M., et al. (2020).  
490 META-R: A software to analyze data from multi-environment plant breeding trials. *Crop J.*  
491 8, 745–756. doi: 10.1016/j.cj.2020.03.010.
- 492 Aoun, M., Breiland, M., Kathryn Turner, M., Loladze, A., Chao, S., Xu, S. S., et al. (2016).  
493 Genome-wide association mapping of leaf rust response in a durum wheat worldwide  
494 germplasm collection. *Plant Genome* 9:3. doi: 10.3835/plantgenome2016.01.0008.
- 495 Aoun, M., Rouse, M. N., Kolmer, J. A., Kumar, A., and Elias, E. M. (2021). Genome-Wide  
496 Association Studies Reveal All-Stage Rust Resistance Loci in Elite Durum Wheat  
497 Genotypes. *Front. Plant Sci.* 12:594. doi: 10.3389/fpls.2021.640739.
- 498 Bansal, M., Kaur, S., Dhaliwal, H. S., Bains, N. S., Bariana, H. S., Chhuneja, P., et al. (2017).  
499 Mapping of *Aegilops umbellulata* -derived leaf rust and stripe rust resistance loci in wheat.  
500 *Plant Pathol.* 66, 38–44. doi: 10.1111/ppa.12549.
- 501 Bariana, H. S., and McIntosh, R. A. (1993). Cytogenetic studies in wheat. XV. Location of rust  
502 resistance genes in VPM1 and their genetic linkage with other disease resistance genes in  
503 chromosome 2A. *Genome* 36, 476–482. doi: 10.1139/g93-065.
- 504 Bates, D., Mächler, M., Bolker, B. M., and Walker, S. C. (2015). Fitting linear mixed-effects  
505 models using lme4. *J. Stat. Softw.* 67, 1-48. doi: 10.18637/jss.v067.i01.
- 506 Błaszczyk, L., Goyeau, H., Huang, X. Q., Röder, M., Stępień, Ł., and Chelkowski, J. (2004).  
507 Identifying leaf rust resistance genes and mapping gene Lr37 on the microsatellite map of  
508 wheat. *Cell. Mol. Biol. Lett.* 9, 869–878. Available at:  
509 <https://europepmc.org/article/med/15647803> [Accessed May 9, 2022].
- 510 Bolton, M. D., Kolmer, J. A., And Garvin, D. F. (2008). Wheat leaf rust caused by *Puccinia*  
511 *tritricina*. *Mol. Plant Pathol.* 9, 563–575. doi: 10.1111/j.1364-3703.2008.00487.x.
- 512 Borrill, P., Ramirez-Gonzalez, R., and Uauy, C. (2016). expVIP: a Customizable RNA-seq Data  
513 Analysis and Visualization Platform. *Plant Physiol.* 170, 2172–2186. doi:  
514 10.1104/pp.15.01667.
- 515 Bremenkamp-Barrett, B., Faris, J. D., and Fellers, J. P. (2008). Molecular Mapping of the Leaf  
516 Rust Resistance Gene *Lr17a* in Wheat. *Crop Sci.* 48, 1124–1128. doi:  
517 10.2135/cropsci2007.07.0379.
- 518 Brown-Guedira, G. L., Singh, S., and Fritz, A. K. (2003). Performance and Mapping of leaf rust  
519 resistance transferred to wheat from *Triticum timopheevii* subsp. *armeniicum*.  
520 *Phytopathology* 93, 784–789. doi: 10.1094/PHYTO.2003.93.7.784.

- 521 Browning, S. R., and Browning, B. L. (2007). Rapid and accurate haplotype phasing and  
522 missing-data inference for whole-genome association studies by use of localized haplotype  
523 clustering. *Am. J. Hum. Genet.* 81, 1084–1097. doi: 10.1086/521987.
- 524 Carpenter, N. R., Griffey, C. A., Baudoin, A. B., Holliday, J. A., and Saghai-Marroof, M. A.  
525 (2017). Identification and mapping of resistance to *Puccinia striiformis* and *Puccinia*  
526 *tritricina* in soft red winter wheat [Doctoral dissertation] [Blacksburg (VA)]: Virginia Tech.
- 527 Che, M., Hiebert, C. W., McCartney, C. A., Zhang, Z., and McCallum, B. D. (2019). Mapping  
528 and DNA marker development for *Lr33* from the leaf rust resistant line KU168-2.  
529 *Euphytica* 215:29. doi: 10.1007/s10681-019-2343-3.
- 530 Chen, J., Zhang, F., Zhao, C., Lv, G., Sun, C., Pan, Y., et al. (2019). Genome-wide association  
531 study of six quality traits reveals the association of the *TaRPP13L1* gene with flour colour  
532 in Chinese bread wheat. *Plant Biotechnol. J.* 17, 2106–2122. doi: 10.1111/pbi.13126.
- 533 Chhetri, M., Bansal, U., Toor, A., Lagudah, E., and Bariana, H. (2016). Genomic regions  
534 conferring resistance to rust diseases of wheat in a W195/BTSS mapping population.  
535 *Euphytica* 209, 637–649. doi: 10.1007/s10681-016-1640-3
- 536 Chhatre, V. E., and Emerson, K. J. (2017). StrAuto: Automation and parallelization of  
537 STRUCTURE analysis. *BMC Bioinfo.* 18:192. doi: 10.1186/s12859-017-1593-0.
- 538 Ciftci-Yilmaz, S., and Mittler, R. (2008). The zinc finger network of plants. *Cell. Mol. Life Sci.*  
539 65, 1150–1160. doi: 10.1007/s00018-007-7473-4.
- 540 Cloutier, S., McCallum, B. D., Loutre, C., Banks, T. W., Wicker, T., Feuillet, C., et al. (2007).  
541 Leaf rust resistance gene *Lr1*, isolated from bread wheat (*Triticum aestivum* L.) is a member  
542 of the large psr567 gene family. *Plant Mol. Biol.* 65, 93–106. doi: 10.1007/s11103-007-  
543 9201-8.
- 544 Dyck, P. L. (1987). The association of a gene for leaf rust resistance with the chromosome 7D  
545 suppressor of stem rust resistance in common wheat. *Genome* 29, 467–469. doi:  
546 10.1139/g87-081.
- 547 Dyck, P. L., and Kerber, E. R. (1977). Inheritance of leaf rust resistance in wheat cultivars  
548 Rafaela and EAP 26127 and chromosome location of gene *Lr17*. *Can. J. Genet. Cytol.* 19,  
549 355–358. doi: 10.1139/g77-038.
- 550 Dyck, P. L., and Samborski, D. J. (1968). Genetics of resistance to leaf rust in the common  
551 wheat varieties Webster, Loros, Brevit, Carina, Malakof and Centenario. *Can. J. Genet.*  
552 *Cytol.* 10, 7–17. doi: 10.1139/g68-002.
- 553 Dyck, P. L., and Samborski, D. J. (1974). Inheritance of virulence in *Puccinia recondita* on  
554 alleles at the *Lr2* locus for resistance in wheat. *Can. J. Genet. Cytol.* 16, 323–332. doi:  
555 10.1139/g74-036.

- 556 Dyck, P. L., Samborski, D. J., and Anderson, R. G. (1966). Inheritance of adult-plant leaf rust  
557 resistance derived from the common wheat varieties Exchange and Frontana. *Can. J. Genet.*  
558 *Cytol.* 8, 665–671. doi: 10.1139/g66-082.
- 559 Earl, D. A., and vonHoldt, B. M. (2012). STRUCTURE HARVESTER: a website and program  
560 for visualizing STRUCTURE output and implementing the Evanno method. *Conserv.*  
561 *Genet. Resour.* 4, 359–361. doi: 10.1007/s12686-011-9548-7.
- 562 Emerson, R. O., and Thomas, J. H. (2009). Adaptive Evolution in zinc finger transcription  
563 factors. *PLoS Genet.* 5, e1000325. doi: 10.1371/journal.pgen.1000325.
- 564 Epple, P., Mack, A. A., Morris, V. R. F., and Dangl, J. L. (2003). Antagonistic control of  
565 oxidative stress-induced cell death in *Arabidopsis* by two related, plant-specific zinc finger  
566 proteins. *Proc. Natl. Acad. Sci.* 100, 6831–6836. doi: 10.1073/pnas.1130421100.
- 567 Evanno, G., Regnaut, S., and Goudet, J. (2005). Detecting the number of clusters of individuals  
568 using the software STRUCTURE: A simulation study. *Mol. Ecol.* 14, 2611–2620. doi:  
569 10.1111/j.1365-294X.2005.02553.x.
- 570 Fatima, F., McCallum, B. D., Pozniak, C. J., Hiebert, C. W., McCartney, C. A., Fedak, G., et al.  
571 (2020). Identification of new leaf rust resistance loci in wheat and wild relatives by array-  
572 based SNP genotyping and association genetics. *Front. Plant Sci.* 11: 583738. doi:  
573 10.3389/fpls.2020.583738.
- 574 Feuillet, C., Travella, S., Stein, N., Albar, L., Nublát, A., and Keller, B. (2003). Map-based  
575 isolation of the leaf rust disease resistance gene *Lr10* from the hexaploid wheat (*Triticum*  
576 *aestivum* L.) genome. *Proc. Natl. Acad. Sci.* 100, 15253–15258. doi:  
577 10.1073/pnas.2435133100.
- 578 Gao, F., Wen, W., Liu, J., Rasheed, A., Yin, G., Xia, X., et al. (2015). Genome-wide linkage  
579 mapping of QTL for yield components, plant height and yield-related physiological traits in  
580 the Chinese wheat cross Zhou 8425B/Chinese spring. *Front. Plant Sci.* 6:1099. doi:  
581 10.3389/fpls.2015.01099.
- 582 Gao, L., Turner, M. K., Chao, S., Kolmer, J., and Anderson, J. A. (2016). Genome wide  
583 association study of seedling and adult plant leaf rust resistance in elite spring wheat  
584 breeding lines. *Euphytica* 11:e0148671. doi: 10.1371/journal.pone.0148671.
- 585 Gill, H. S., Halder, J., Zhang, J., Brar, N. K., Rai, T. S., Hall, C., et al. (2021). Multi-Trait Multi-  
586 Environment Genomic Prediction of Agronomic Traits in Advanced Breeding Lines of  
587 Winter Wheat. *Front. Plant Sci.* 12, 1-14. doi: 10.3389/fpls.2021.709545.
- 588 Gill, H. S., Li, C., Sidhu, J. S., Liu, W., Wilson, D., Bai, G., et al. (2019). Fine mapping of the  
589 wheat leaf rust resistance gene *Lr42*. *Int. J. Mol. Sci.* 20:2445. doi: 10.3390/ijms20102445.
- 590 Gyawali, S., Chao, S., Vaish, S. S., Singh, S. P., Rehman, S., Vishwakarma, S. R., et al. (2018).  
591 Genome wide association studies (GWAS) of spot blotch resistance at the seedling and the



- 592 adult plant stages in a collection of spring barley. *Mol. Breed.* 38:62. doi: 10.1007/s11032-  
593 018-0815-0.
- 594 Halder, J., Zhang, J., Ali, S., Sidhu, J. S., Gill, H. S., Talukder, S. K., et al. (2019). Mining and  
595 genomic characterization of resistance to tan spot, *Stagonospora nodorum* blotch (SNB),  
596 and *Fusarium* head blight in Watkins core collection of wheat landraces. *BMC Plant Biol.*  
597 19, 1–15. doi: 10.1186/s12870-019-2093-3.
- 598 He, F., Pasam, R., Shi, F., Kant, S., Keeble-Gagnere, G., Kay, P., et al. (2019). Exome  
599 sequencing highlights the role of wild-relative introgression in shaping the adaptive  
600 landscape of the wheat genome. *Nat. Genet.* 51, 896–904. doi: 10.1038/s41588-019-0382-2.
- 601 Herrera-Foessel, S. A., Singh, R. P., Huerta-Espino, J., Rosewarne, G. M., Periyannan, S. K.,  
602 Viccars, L., et al. (2012). Lr68: A new gene conferring slow rusting resistance to leaf rust in  
603 wheat. *Theor. Appl. Genet.* 124, 1475–1486. doi: 10.1007/S00122-012-1802-1.
- 604 Hewitt, T., Zhang, J., Huang, L., Upadhyaya, N., Li, J., Park, R., et al. (2021). Wheat leaf rust  
605 resistance gene *Lr13* is a specific Ne2 allele for hybrid necrosis. *Mol. Plant* 14, 1025–1028.  
606 doi: 10.1016/j.molp.2021.05.010
- 607 Hiebert, C. W., Thomas, J. B., McCallum, B. D., Humphreys, D. G., DePauw, R. M., Hayden,  
608 M. J., et al. (2010). An introgression on wheat chromosome 4DL in RL6077 (Thatcher\*6/PI  
609 250413) confers adult plant resistance to stripe rust and leaf rust (Lr67). *Theor. Appl. Genet.*  
610 121, 1083–1091. doi: 10.1007/s00122-010-1373-y.
- 611 Huang, L., Brooks, S. A., Li, W., Fellers, J. P., Trick, H. N., and Gill, B. S. (2003). Map-based  
612 cloning of leaf rust resistance gene *Lr21* from the large and polyploid genome of bread  
613 wheat. *Genetics* 164, 655–664. doi: 10.1093/genetics/164.2.655.
- 614 Huerta-Espino, J., Singh, R. P., Germán, S., McCallum, B. D., Park, R. F., Chen, W. Q., et al.  
615 (2011). Global status of wheat leaf rust caused by *Puccinia triticina*. *Euphytica* 179, 143–  
616 160. doi: 10.1007/s10681-011-0361-x.
- 617 Joukhadar, R., El-Bouhssini, M., Jighly, A., and Ogbonnaya, F. C. (2013). Genome-wide  
618 association mapping for five major pest resistances in wheat. *Mol. Breed.* 32, 943–960. doi:  
619 10.1007/s11032-013-9924-y.
- 620 Joukhadar, R., Hollaway, G., Shi, F., Kant, S., Forrest, K., Wong, D., et al. (2020). Genome-  
621 wide association reveals a complex architecture for rust resistance in 2300 worldwide bread  
622 wheat accessions screened under various Australian conditions. *Theor. Appl. Genet.* 133,  
623 2695–2712. doi: 10.1007/s00122-020-03626-9.
- 624 Kang, J., Park, J., Choi, H., Burla, B., Kretschmar, T., Lee, Y., et al. (2011). Plant ABC  
625 Transporters. *Arabidopsis* book. 9:e0153. doi: 10.1199/tab.0153.
- 626 Kerber, E. R., and Dyck, P. L. (1990). Transfer to hexaploid wheat of linked genes for adult-  
627 plant leaf rust and seedling stem rust resistance from an amphiploid of *Aegilops speltoides* ×  
628 *Triticum monococcum*. *Genome* 33, 530–537. doi: 10.1139/g90-079.

- 629 Kolmer, J. A. (1996). Genetics of resistance to wheat leaf rust. *Annu. Rev. Phytopathol.* 34, 435–  
630 455. doi: 10.1146/annurev.phyto.34.1.435.
- 631 Kolmer, J. A. (2005). Tracking wheat rust on a continental scale. *Curr. Opin. Plant Biol.* 8, 441–  
632 449. doi: 10.1016/j.pbi.2005.05.001.
- 633 Kolmer, J. A. (2019). Virulence of *Puccinia triticina*, the wheat leaf rust fungus, in the United  
634 States in 2017. *Plant Dis.* 103, 2113–2120. doi: 10.1094/PDIS-09-18-1638-SR.
- 635 Kolmer, J. A., Bernardo, A., Bai, G., Hayden, M. J., and Chao, S. (2018a). Adult plant leaf rust  
636 resistance derived from Toropi wheat is conditioned by *Lr78* and three minor QTL.  
637 *Phytopathology* 108, 246–253. doi: 10.1094/PHYTO-07-17-0254-R.
- 638 Kolmer, J. A., Jin, Y., and Long, D. L. (2007). Wheat leaf and stem rust in the United States.  
639 *Aust. J. Agric. Res.* 58:631-638. doi: 10.1071/AR07057.
- 640 Kolmer, J. A., Su, Z., Bernardo, A., Bai, G., and Chao, S. (2018b). Mapping and characterization  
641 of the new adult plant leaf rust resistance gene *Lr77* derived from Santa Fe winter wheat.  
642 *Theor. Appl. Genet.* 131, 1553–1560. doi: 10.1007/s00122-018-3097-3.
- 643 Kolodziej, M. C., Singla, J., Sánchez-Martín, J., Zbinden, H., Šimková, H., Karafiátová, M.,  
644 et al. (2021). A membrane-bound ankyrin repeat protein confers race-specific leaf rust  
645 disease resistance in wheat. *Nat. Commun.* 12, 956. doi: 10.1038/s41467-020-20777-x
- 646 Krattinger, S. G., Lagudah, E. S., Spielmeyer, W., Singh, R. P., Huerta-Espino, J., McFadden,  
647 H., et al. (2009). A putative ABC transporter confers durable resistance to multiple fungal  
648 pathogens in wheat. *Science* 323, 1360–1363. doi: 10.1126/science.1166453.
- 649 Kristensen, P. S., Jahoor, A., Andersen, J. R., Cericola, F., Orabi, J., Janss, L. L., et al. (2018).  
650 Genome-wide association studies and comparison of models and cross-validation strategies  
651 for genomic prediction of quality traits in advanced winter wheat breeding lines. *Front.*  
652 *Plant Sci.* 9:69. doi: 10.3389/fpls.2018.00069.
- 653 Kumar, D., Kumar, A., Chhokar, V., Gangwar, O. P., Bhardwaj, S. C., Sivasamy, M., et al.  
654 (2020). Genome-wide association studies in diverse spring wheat panel for stripe, stem, and  
655 leaf rust resistance. *Front. Plant Sci.* 11:748. doi: 10.3389/fpls.2020.00748.
- 656 Kumar, D., Sharma, S., Sharma, R., Pundir, S., Singh, V. K., Chaturvedi, D., et al. (2021a).  
657 Genome-wide association study in hexaploid wheat identifies novel genomic regions  
658 associated with resistance to root lesion nematode (*Pratylenchus thornei*). *Sci. Rep.* 11:  
659 3572. doi: 10.1038/s41598-021-80996-0.
- 660 Kumar, S., Bhardwaj, S. C., Gangwar, O. P., Sharma, A., Qureshi, N., Kumaran, V. V., et al.  
661 (2021b). *Lr80*: A new and widely effective source of leaf rust resistance of wheat for  
662 enhancing diversity of resistance among modern cultivars. *Theor. Appl. Genet.* 134, 849–  
663 858. doi: 10.1007/s00122-020-03735-5.

- 664 Leonova, I. N., Skolotneva, E. S., and Salina, E. A. (2020). Genome-wide association study of  
665 leaf rust resistance in Russian spring wheat varieties. *BMC Plant Biol.* 20:135. doi:  
666 10.1186/s12870-020-02333-3.
- 667 Li, G., Xu, X., Bai, G., Carver, B. F., Hunger, R., Bonman, J. M., et al. (2016). Genome-wide  
668 association mapping reveals novel QTL for seedling leaf rust resistance in a worldwide  
669 collection of winter wheat. *Plant Genome* 9, 1-12. doi: 10.3835/plantgenome2016.06.0051.
- 670 Lin, G., Chen, H., Tian, B., Sehgal, S., Singh, L., Xie, J., et al. (2022). Cloning of the broadly  
671 effective wheat leaf rust resistance gene *Lr42* transferred from *Aegilops tauschii*. *Nat.*  
672 *Commun.* 13:3044. doi: 10.1038/s41467-022-30784-9
- 673 Liu, X., Huang, M., Fan, B., Buckler, E. S., and Zhang, Z. (2016). Iterative usage of fixed and  
674 random effect models for powerful and efficient genome-wide association studies. *PLOS*  
675 *Genet.* 12:e1005767. doi: 10.1371/journal.pgen.1005767.
- 676 Mago, R., Tabe, L., McIntosh, R. A., Pretorius, Z., Kota, R., Paux, E., et al. (2011). A multiple  
677 resistance locus on chromosome arm 3BS in wheat confers resistance to stem rust (*Sr2*),  
678 leaf rust (*Lr27*) and powdery mildew. *Theor. Appl. Genet.* 123, 615–623. doi:  
679 10.1007/s00122-011-1611-y.
- 680 Máthé, C., Garda, T., Freytag, C., and M-Hamvas, M. (2019). The role of serine-threonine  
681 protein phosphatase PP2A in plant oxidative stress signaling—facts and hypotheses. *Int. J.*  
682 *Mol. Sci.* 20:3028. doi: 10.3390/ijms20123028.
- 683 McIntosh, R. A., Miller, T. E., and Chapman, V. (1982). Cytogenetical studies in wheat XII.  
684 *Lr28* for resistance to *Puccinia recondita* and *Sr34* for resistance to *P. graminis tritici*. *Z.*  
685 *Pflanzenzucht* 89, 295–306.
- 686 Mohler, V., Singh, D., Singrün, C., and Park, R. F. (2012). Characterization and mapping of  
687 *Lr65* in spelt wheat ‘Altgold Rotkorn.’ *Plant Breed.* 131, 252–257. doi: 10.1111/j.1439-  
688 0523.2011.01934.x.
- 689 Mondal, S., Rutkoski, J. E., Velu, G., Singh, P. K., Crespo-Herrera, L. A., Guzmán, C., et al.  
690 (2016). Harnessing diversity in wheat to enhance grain yield, climate resilience, disease and  
691 insect pest resistance and nutrition through conventional and modern breeding approaches.  
692 *Front. Plant Sci.* 7:991. doi: 10.3389/fpls.2016.00991.
- 693 Moore, J. W., Herrera-Foessel, S., Lan, C., Schnippenkoetter, W., Ayliffe, M., Huerta-Espino, J.,  
694 et al. (2015). A recently evolved hexose transporter variant confers resistance to multiple  
695 pathogens in wheat. *Nat. Genet.* 47, 1494–1498. doi: 10.1038/ng.3439.
- 696 País, S. M., Teresa Téllez-Iñón, M., and Capiati, D. A. (2009). Serine/Threonine protein  
697 phosphatases type 2A and their roles in stress signaling. *Plant Signal. Behav.* 4, 1013–1015.  
698 doi: 10.4161/psb.4.11.9783.
- 699 Pang, Y., Liu, C., Wang, D., St. Amand, P., Bernardo, A., Li, W., et al. (2020). High-resolution  
700 genome-wide association study identifies genomic regions and candidate genes for

- 701 important agronomic traits in wheat. *Mol. Plant* 13, 1311–1327. doi:  
702 10.1016/j.molp.2020.07.008.
- 703 Park, R. F., and McIntosh, R. A. (1994). Adult plant resistances to *Puccinia recondita* f. sp.  
704 *tritici* in wheat. *New Zealand Journal of Crop and Horticultural Science* 22, 151–158. doi:  
705 10.1080/01140671.1994.9513819.
- 706 Phan, H. T. T., Rybak, K., Bertazzoni, S., Furuki, E., Dinglasan, E., Hickey, L. T., et al. (2018).  
707 Novel sources of resistance to *Septoria nodorum* blotch in the Vavilov wheat collection  
708 identified by genome-wide association studies. *Theor. Appl. Genet.* 131, 1223–1238. doi:  
709 10.1007/s00122-018-3073-y.
- 710 Prasad, P., Savadi, S., Bhardwaj, S. C., and Gupta, P. K. (2020). The progress of leaf rust  
711 research in wheat. *Fungal Biol.* 124, 537–550. doi: 10.1016/j.funbio.2020.02.013.
- 712 Pritchard, J. K., Stephens, M., and Donnelly, P. (2000). Inference of population structure using  
713 multilocus genotype data. *Genetics* 155, 945–959.
- 714 Purcell, S., Neale, B., Todd-Brown, K., Thomas, L., Ferreira, M. A. R., Bender, D., et al. (2007).  
715 PLINK: A tool set for whole-genome association and population-based linkage analyses.  
716 *Am. J. Hum. Genet.* 81, 559–575. doi: 10.1086/519795.
- 717 Qureshi, N., Bariana, H., Kumran, V. V., Muruga, S., Forrest, K. L., Hayden, M. J., et al. (2018).  
718 A new leaf rust resistance gene *Lr79* mapped in chromosome 3BL from the durum wheat  
719 landrace Aus26582. *Theor. Appl. Genet.* 131, 1091–1098. doi: 10.1007/s00122-018-3060-3.
- 720 R Core Team (2018). R: A language and environment for statistical computing; 2015.
- 721 Sapkota, S., Hao, Y., Johnson, J., Buck, J., Aoun, M., and Mergoum, M. (2019). Genome-wide  
722 association study of a worldwide collection of wheat genotypes reveals novel quantitative  
723 trait loci for leaf rust resistance. *Plant Genome* 12:190033. doi:  
724 10.3835/plantgenome2019.05.0033.
- 725 Savary, S., Willocquet, L., Pethybridge, S. J., Esker, P., McRoberts, N., and Nelson, A. (2019).  
726 The global burden of pathogens and pests on major food crops. *Nat. Ecol. Evol.* 3, 430–439.  
727 doi: 10.1038/s41559-018-0793-y.
- 728 Schnurbusch, T., Paillard, S., Schori, A., Messmer, M., Schachermayr, G., Winzeler, M., et al.  
729 (2004). Dissection of quantitative and durable leaf rust resistance in Swiss winter wheat  
730 reveals a major resistance QTL in the *Lr34* chromosomal region. *Theor. Appl. Genet.* 108,  
731 477–484. doi: 10.1007/s00122-003-1444-4.
- 732 Seyfarth, R., Feuillet, C., Schachermayr, G., Winzeler, M., and Keller, B. (1999). Development  
733 of a molecular marker for the adult plant leaf rust resistance gene *Lr35* in wheat. *Theor.*  
734 *Appl. Genet.* 99, 554–560. doi: 10.1007/s001220051268.

- 735 Sidhu, J. S., Singh, D., Gill, H. S., Brar, N. K., Qiu, Y., Halder, J., et al. (2020). Genome-wide  
736 association study uncovers novel genomic regions associated with coleoptile length in hard  
737 winter wheat. *Front. Genet.* 10:1345. doi: 10.3389/fgene.2019.01345.
- 738 Singh, D., Park, R. F., and McIntosh, R. A. (1999). Genetic relationship between the adult plant  
739 resistance gene *Lr12* and the complementary gene *Lr31* for seedling resistance to leaf rust in  
740 common wheat. *Plant Pathol.* 48, 567–573. doi: 10.1046/j.1365-3059.1999.00391.x.
- 741 Singh, R. P., Huerta-Espino, J., Roelfs, A. P., and Curtis, B. C. (2002). “The wheat rusts,” in  
742 *Bread Wheat-Improvement and Production*, eds B. C. Curtis, S. Rajaram, and H. G.  
743 Macherson (Rome: FAO Plant Production and Protection Series), 227–249.
- 744 Singh, R. P., and McIntosh, R. A. (1984). Complementary genes for reaction to *Puccinia*  
745 *recondita tritici* in *Triticum aestivum*. I. Genetic and linkage studies. *Can. J. Genet. Cytol.*  
746 26, 723–735. doi: 10.1139/g84-115.
- 747 Singh, R. P., Mujeeb-Kazi, A., and Huerta-Espino, J. (1998). *Lr46*: A Gene Conferring Slow-  
748 Rusting Resistance to Leaf Rust in Wheat. *Phytopathology* 88, 890–894. doi:  
749 10.1094/PHYTO.1998.88.9.890.
- 750 Singh, S., and Bowden, R. L. (2011). Molecular mapping of adult-plant race-specific leaf rust  
751 resistance gene *Lr12* in bread wheat. *Mol. Breed.* 28, 137–142. doi: 10.1007/s11032-010-  
752 9467-4.
- 753 Singla, J., Lüthi, L., Wicker, T., Bansal, U., Krattinger, S. G., and Keller, B. (2017).  
754 Characterization of *Lr75*: a partial, broad-spectrum leaf rust resistance gene in wheat.  
755 *Theor. Appl. Genet.* 130, 1–12. doi: 10.1007/s00122-016-2784-1.
- 756 Stakman, E. C., Stewart, D. M., and Loegering, W. Q. (1962). *Identification of Physiologic*  
757 *Races of Puccinia graminis var. tritici*. Washington, DC: USDA Agricultural Research  
758 Service E617.
- 759 Sukumaran, S., Dreisigacker, S., Lopes, M., Chavez, P., and Reynolds, M. P. (2015). Genome-  
760 wide association study for grain yield and related traits in an elite spring wheat population  
761 grown in temperate irrigated environments. *Theor. Appl. Genet.* 128, 353–363. doi:  
762 10.1007/s00122-014-2435-3.
- 763 Thind, A. K., Wicker, T., Šimková, H., Fossati, D., Moullet, O., Brabant, C., et al. (2017). Rapid  
764 cloning of genes in hexaploid wheat using cultivar-specific long-range chromosome  
765 assembly. *Nat. Biotechnol.* 35, 793–796. doi: 10.1038/nbt.3877.
- 766 Tibbs Cortes, L., Zhang, Z., and Yu, J. (2021). Status and prospects of genome-wide association  
767 studies in plants. *Plant Genome* 14:e20077. doi: 10.1002/tpg2.20077.
- 768 Torii, K. U. (2004). Leucine-rich repeat receptor kinases in plants: structure, function, and signal  
769 transduction pathways. *Int. Rev. Cytol.* 234, 1–46. doi: 10.1016/s0074-7696(04)34001-5

- 770 Tsilo, T. J., Kolmer, J. A., and Anderson, J. A. (2014). Molecular mapping and improvement of  
771 leaf rust resistance in wheat breeding lines. *Phytopathology* 104, 865–870. doi:  
772 10.1094/PHYTO-10-13-0276-R.
- 773 Vikas, V. K., Pradhan, A. K., Budhlakoti, N., Mishra, D. C., Chandra, T., Bhardwaj, S. C., et al.  
774 (2022). Multi-locus genome-wide association studies (ML-GWAS) reveal novel genomic  
775 regions associated with seedling and adult plant stage leaf rust resistance in bread wheat  
776 (*Triticum aestivum* L.). *Heredity (Edinb)*. 128, 434–449. doi: 10.1038/s41437-022-00525-1.
- 777 Wang, J., and Zhang, Z. (2021). GAPIT Version 3: Boosting Power and Accuracy for Genomic  
778 Association and Prediction. *Genomics, Proteomics & Bioinformatics*. doi:  
779 10.1016/j.gpb.2021.08.005.
- 780 Wang, Y., Abrouk, M., Gourdupis, S., Koo, D., Karafiátová, M., Molnár, I., et al. (2022). An  
781 unusual tandem kinase fusion protein confers leaf rust resistance in wheat. *Res. Square* 185,  
782 2961–2974.e19. doi: 10.21203/rs.3.rs-1807889/v1
- 783 Wang, Y., Peng, H., Liu, G., Xie, C., Ni, Z., Yang, T., et al. (2010). Identification and molecular  
784 mapping of a leaf rust resistance gene in spelt wheat landrace Altgold. *Euphytica* 174, 371–  
785 375. doi: 10.1007/s10681-010-0134-y.
- 786 Ward, B. P., Brown-Guedira, G., Kolb, F. L., Van Sanford, D. A., Tyagi, P., Sneller, C. H., et al.  
787 (2019). Genome-wide association studies for yield-related traits in soft red winter wheat  
788 grown in Virginia. *PLoS One* 14, e0208217. doi: 10.1371/journal.pone.0208217.
- 789 Wickham, H. (2016). *ggplot2: Elegant Graphics for Data Analysis*. Springer-Verlag: New York.  
790 Available at: <https://cran.r-project.org/web/packages/ggplot2/citation.html>.
- 791 Yan, X., Li, M., Zhang, P., Yin, G., Zhang, H., Gebrewahid, T. W., et al. (2021). High-  
792 temperature wheat leaf rust resistance gene *Lr13* exhibits pleiotropic effects on hybrid  
793 necrosis. *Mol. Plant* 14, 1029–1032. doi: 10.1016/j.molp.2021.05.009
- 794 Yang, Y., Chai, Y., Zhang, X., Lu, S., Zhao, Z., Wei, D., et al. (2020). Multi-locus GWAS of  
795 quality traits in bread wheat: mining more candidate genes and possible regulatory network.  
796 *Front. Plant Sci.* 11:1091. doi: 10.3389/fpls.2020.01091.
- 797 Yu, J., Pressoir, G., Briggs, W. H., Bi, I. V., Yamasaki, M., Doebley, J. F., et al. (2006). A  
798 unified mixed-model method for association mapping that accounts for multiple levels of  
799 relatedness. *Nat. Genet.* 38, 203–208. doi: 10.1038/ng1702.
- 800 Zhang, C., Dong, S.-S., Xu, J.-Y., He, W.-M., and Yang, T.-L. (2019a). PopLDdecay: a fast and  
801 effective tool for linkage disequilibrium decay analysis based on variant call format files.  
802 *Bioinformatics* 35, 1786–1788. doi: 10.1093/bioinformatics/bty875.
- 803 Zhang, D., Bowden, R. L., Yu, J., Carver, B. F., and Bai, G. (2014). Association Analysis of  
804 Stem Rust Resistance in U.S. Winter Wheat. *PLoS One* 9:e103747. doi:  
805 10.1371/journal.pone.0103747.

- 806 Zhang P., Yan X., Gebrewahid T. W., Zhou Y., Yang E., Xia X., et al. (2021a). Genome-wide  
807 association mapping of leaf rust and stripe rust resistance in wheat accessions using the 90K  
808 SNP array. *Theor. Appl. Genet.* 134,1233–1251. doi: 10.1007/s00122-021-03769-3.
- 809 Zhang, Q., Wei, W., Zuansun, X., Zhang, S., Wang, C., Liu, N., et al. (2021b). Fine Mapping of  
810 the leaf rust resistance gene *Lr65* in Spelt Wheat “Altgold”. *Front. Plant Sci.* 12:666921.  
811 doi: 10.3389/fpls.2021.666921.
- 812 Zhang, Y.-M., Jia, Z., and Dunwell, J. M. (2019b). The application of new multi-locus GWAS  
813 methodologies in the genetic dissection of complex traits. *Front. Plant Sci.* 10, 1-6. doi:  
814 10.3389/fpls.2019.00100.
- 815 Zheng, X., Levine, D., Shen, J., Gogarten, S. M., Laurie, C., and Weir, B. S. (2012). A high-  
816 performance computing toolset for relatedness and principal component analysis of SNP  
817 data. *Bioinformatics* 28, 3326–3328. doi: 10.1093/bioinformatics/bts606.
- 818 Zhu, C., Gore, M., Buckler, E. S., and Yu, J. (2008). Status and prospects of association mapping  
819 in plants. *Plant Genome* 1, 5-20. doi: 10.3835/plantgenome2008.02.0089.
- 820 Zhu, Z., Chen, L., Zhang, W., Yang, L., Zhu, W., Li, J., et al. (2020). Genome-wide  
821 association analysis of Fusarium head blight resistance in Chinese elite wheat lines.  
822 *Front. Plant Sci.* 11:206. doi: 10.3389/fpls.2020.00206.

823

824

825

826

827

828

829

830

831

832

833

834

835

## 836 **Figures**

837 Figure 1. Distribution of infection response (IR) against various races of *Pt* observed during the  
838 seedling evaluation of 365 accessions using boxplots and histograms. The X-axis represents the  
839 four different *Pt* races and the Y-axis represents the IR in 0-9 scale.

840 Figure 2. Population structure analysis in panel of 365 wheat accessions based on the 3,02,524  
841 SNPs. (A) Evanno plot of Delta-K statistic from the STRUCTURE analysis. (B) Scree plot for  
842 first 10 components obtained from principal component analysis (PCA). (C) Scatterplot based on  
843 the first two components (PC1 and PC2) from PCA.

844 Figure 3. Manhattan plots from genome-wide association studies showing the distinct peaks for  
845 identified MTAs in response to (A) MNPSD, (B) TBBGS, (C) TDBJQ, and (D) TNBJS races of  
846 *P. triticina*. The red horizontal line represents the threshold used to report MTAs for each race.

847 Figure 4. Linear regression plots of seedling response toward *P. triticina* races (A) MNPSD, (B)  
848 TBBGS and, (C) TNBJS to the number of favorable alleles of identified MTAs for respective  
849 races.

850 Supplementary Figure S1. Correlation analysis among the phenotypic data of 365 wheat  
851 accessions evaluated for their reaction to *P. triticina* races TDBJQ, TBBGS, MNPSD, and  
852 TNBJS.

853 Supplementary Figure S2. Scatterplot based on the first two components (PC1 and PC2) from  
854 PCA for (A) growth habit and (B) geographic origin.

855 Supplementary Figure S3. Intra-chromosomal linkage disequilibrium in the diversity panel for  
856 (A) whole genome and, individually in the (B) A, (C) B, and (D) D sub-genomes.

857 Supplementary Figure S4. Box-cox transformations performed for *Pt* races TDBJQ, TBBGS,  
858 MNPSD, and TNBJS to normalize the data.

859

860

861

862

863

864

865

866

867

868



869 **Tables**

870 **Table 1.** Descriptive statistical analysis of the infection response (IR) calculated from the  
871 infection types of the 365 wheat genotypes to *P. triticina* races TDBJQ, TBBGS, MNPSD, and  
872 TNBJS.

873

| <b>Leaf rust<br/>race</b> | <b>Mean</b> | <b>Minimum</b> | <b>Maximum</b> | <b>SD<sup>a</sup></b> | <b>H<sup>2b</sup></b> |
|---------------------------|-------------|----------------|----------------|-----------------------|-----------------------|
| TDBJQ                     | 6.4         | 0.4            | 8.7            | 1.48                  | 0.82                  |
| TBBGS                     | 6.3         | 0.3            | 9.0            | 1.83                  | 0.82                  |
| MNPSD                     | 5.4         | 0.0            | 8.5            | 1.57                  | 0.88                  |
| TNBJS                     | 6.3         | 0.7            | 9.0            | 1.80                  | 0.89                  |

874 <sup>a</sup> Standard Deviation

875 <sup>b</sup> Broad-sense heritability

876

877

878

879

880

881

882

883

884

885

886

887

888

889

890

891

892

893

894

895 **Table 2.** Percent distribution of the diversity panel accessions based on their linearized seedling  
896 infection responses (IRs) against *P. triticina* races TDBJQ, TBBGS, MNPSD, and TNBJS.  
897 Range of IR score for each category is given in the parenthesis.

898

| <b>Leaf rust race</b> | <b>% Highly Resistant<br/>(0-4)</b> | <b>% Moderately resistant<br/>(5-6)</b> | <b>% Susceptible<br/>(7-9)</b> |
|-----------------------|-------------------------------------|-----------------------------------------|--------------------------------|
| TDBJQ                 | 9.8                                 | 41.4                                    | 48.8                           |
| TBBGS                 | 13.5                                | 40.8                                    | 45.7                           |
| MNPSD                 | 12.5                                | 74.8                                    | 12.7                           |
| TNBJS                 | 8.1                                 | 44.5                                    | 47.4                           |

899

900

901

902

903

904

905

906

907

908

909

910

911

912

913

914

915

916

917

918

919

920

921 **Table 3.** Number and percentage of lines resistant to different combinations of the four *P.*  
922 *tritricina* races.

923

| <b>Leaf rust race combination</b> | <b>Number of lines<br/>(R/MR)</b> | <b>Percentage of lines</b> |
|-----------------------------------|-----------------------------------|----------------------------|
| TDBJQ+TBBGS+MNPSD+TNBJS           | 71                                | 19.5                       |
| TDBJQ+TBBGS+MNPSD                 | 94                                | 25.8                       |
| TDBJQ+MNPSD+TNBJS                 | 101                               | 27.7                       |
| TDBJQ+TBBGS+TNBJS                 | 78                                | 21.4                       |
| MNPSD+TBBGS+TNBJS                 | 102                               | 27.9                       |
| TDBJQ+TBBGS                       | 109                               | 29.9                       |
| TDBJQ+MNPSD                       | 160                               | 43.8                       |
| TDBJQ+TNBJS                       | 112                               | 30.7                       |
| MNPSD+TBBGS                       | 170                               | 46.6                       |
| TBBGS+TNBJS                       | 111                               | 30.4                       |
| MNPSD+TNBJS                       | 167                               | 45.8                       |

924

925

926

927

928

929

930

931

932

933

934

935

936

937

938

939

940 **Table 4.** Summary of the marker-trait associations (MTAs) identified for resistance to *P.*  
 941 *triticina* races MNPSD, TBBGS, TDBJQ, and TNBJS.

942

| Race  | SNP                     | Chrom | Position <sup>a</sup> | Allele <sup>b</sup> | P value | Effect <sup>c</sup> | -Log <sub>10</sub> (P) |
|-------|-------------------------|-------|-----------------------|---------------------|---------|---------------------|------------------------|
| MNPSD | scaffold43155_283689    | 1A    | 32,381,168            | T/C                 | 3.9E-07 | 0.36                | 6.4                    |
|       | scaffold57495_4340875   | 2B    | 448,878,050           | G/T                 | 5.9E-08 | -0.74               | 7.2                    |
|       | scaffold109282_20590799 | 2D    | 62,620,318            | C/T                 | 4.4E-09 | -0.41               | 8.4                    |
|       | scaffold9496_550027     | 3B    | 456,405,981           | T/C                 | 3.2E-12 | 0.91                | 11.5                   |
|       | scaffold35818-1_1947539 | 4A    | 601,155,551           | T/C                 | 4.8E-06 | 0.28                | 5.3                    |
|       | scaffold6836_258869     | 4B    | 1,789,216             | G/A                 | 8.9E-07 | 0.32                | 6.0                    |
|       | scaffold31373_401257    | 5A    | 30,099,694            | G/C                 | 1.3E-06 | 0.41                | 5.9                    |
|       | scaffold33098_3932746   | 5B    | 347,928,790           | T/C                 | 1.1E-08 | 0.43                | 7.9                    |
|       | scaffold81325_356781    | 5B    | 586,845,078           | C/T                 | 9.0E-06 | 0.45                | 5.0                    |
| TBBGS | scaffold35219_1114450   | 1B    | 17,885,002            | G/T                 | 3.4E-06 | 0.47                | 5.5                    |
|       | scaffold145719_3415472  | 1B    | 69,906,201            | C/T                 | 6.8E-08 | -0.81               | 7.2                    |
|       | scaffold33664_2059905   | 2A    | 4,217,825             | A/T                 | 7.6E-07 | 0.40                | 6.1                    |
|       | scaffold57658-1_2072073 | 2A    | 547,134,074           | T/C                 | 7.0E-08 | -0.47               | 7.1                    |
|       | scaffold22480_722430    | 3B    | 544,111,954           | G/A                 | 4.2E-08 | 0.46                | 7.4                    |
|       | scaffold73828-3_704067  | 4B    | 538,266,707           | A/G                 | 3.5E-06 | 0.33                | 5.5                    |
|       | scaffold20863_2950181   | 5A    | 514,152,049           | T/A                 | 3.4E-06 | 0.66                | 5.5                    |
|       | scaffold81142-6_3121151 | 5B    | 115,397,685           | G/T                 | 2.2E-08 | -0.80               | 7.7                    |
|       | scaffold84762_1725496   | 6B    | 21,911,761            | A/G                 | 6.9E-07 | -0.59               | 6.1                    |
| TDBJQ | scaffold38811_1402219   | 4D    | 503,867,312           | T/C                 | 1.0E-05 | 0.70                | 5.0                    |
| TNBJS | scaffold123808_1588140  | 1A    | 21,616,147            | A/G                 | 1.0E-05 | -0.48               | 5.0                    |
|       | scaffold33401_3398330   | 1B    | 119,884,884           | G/A                 | 5.0E-06 | 0.63                | 5.3                    |
|       | scaffold56230_857271    | 2B    | 671,745,210           | C/T                 | 1.4E-07 | 0.28                | 6.8                    |
|       | scaffold98508-7_1879233 | 2B    | 768,104,692           | T/C                 | 2.0E-08 | 0.34                | 7.7                    |
|       | scaffold67556_44513     | 2D    | 37,367,713            | T/C                 | 4.7E-06 | 0.54                | 5.3                    |
|       | scaffold151621_1347043  | 3B    | 829,196,566           | C/T                 | 1.1E-08 | -0.79               | 7.9                    |
|       | scaffold63719_1362898   | 4A    | 625,284,220           | C/T                 | 8.7E-11 | 0.81                | 10.1                   |
|       | scaffold163140-5_613860 | 4A    | 725,750,499           | A/G                 | 6.1E-06 | -0.29               | 5.2                    |

943 <sup>a</sup> Position is based on IWGSC RefSeq v1.0 (IWGSD, 2018)

944 <sup>b</sup> Allele nomenclature: Major allele/Minor allele

945 <sup>c</sup> SNP effect

946

947

948

949

950

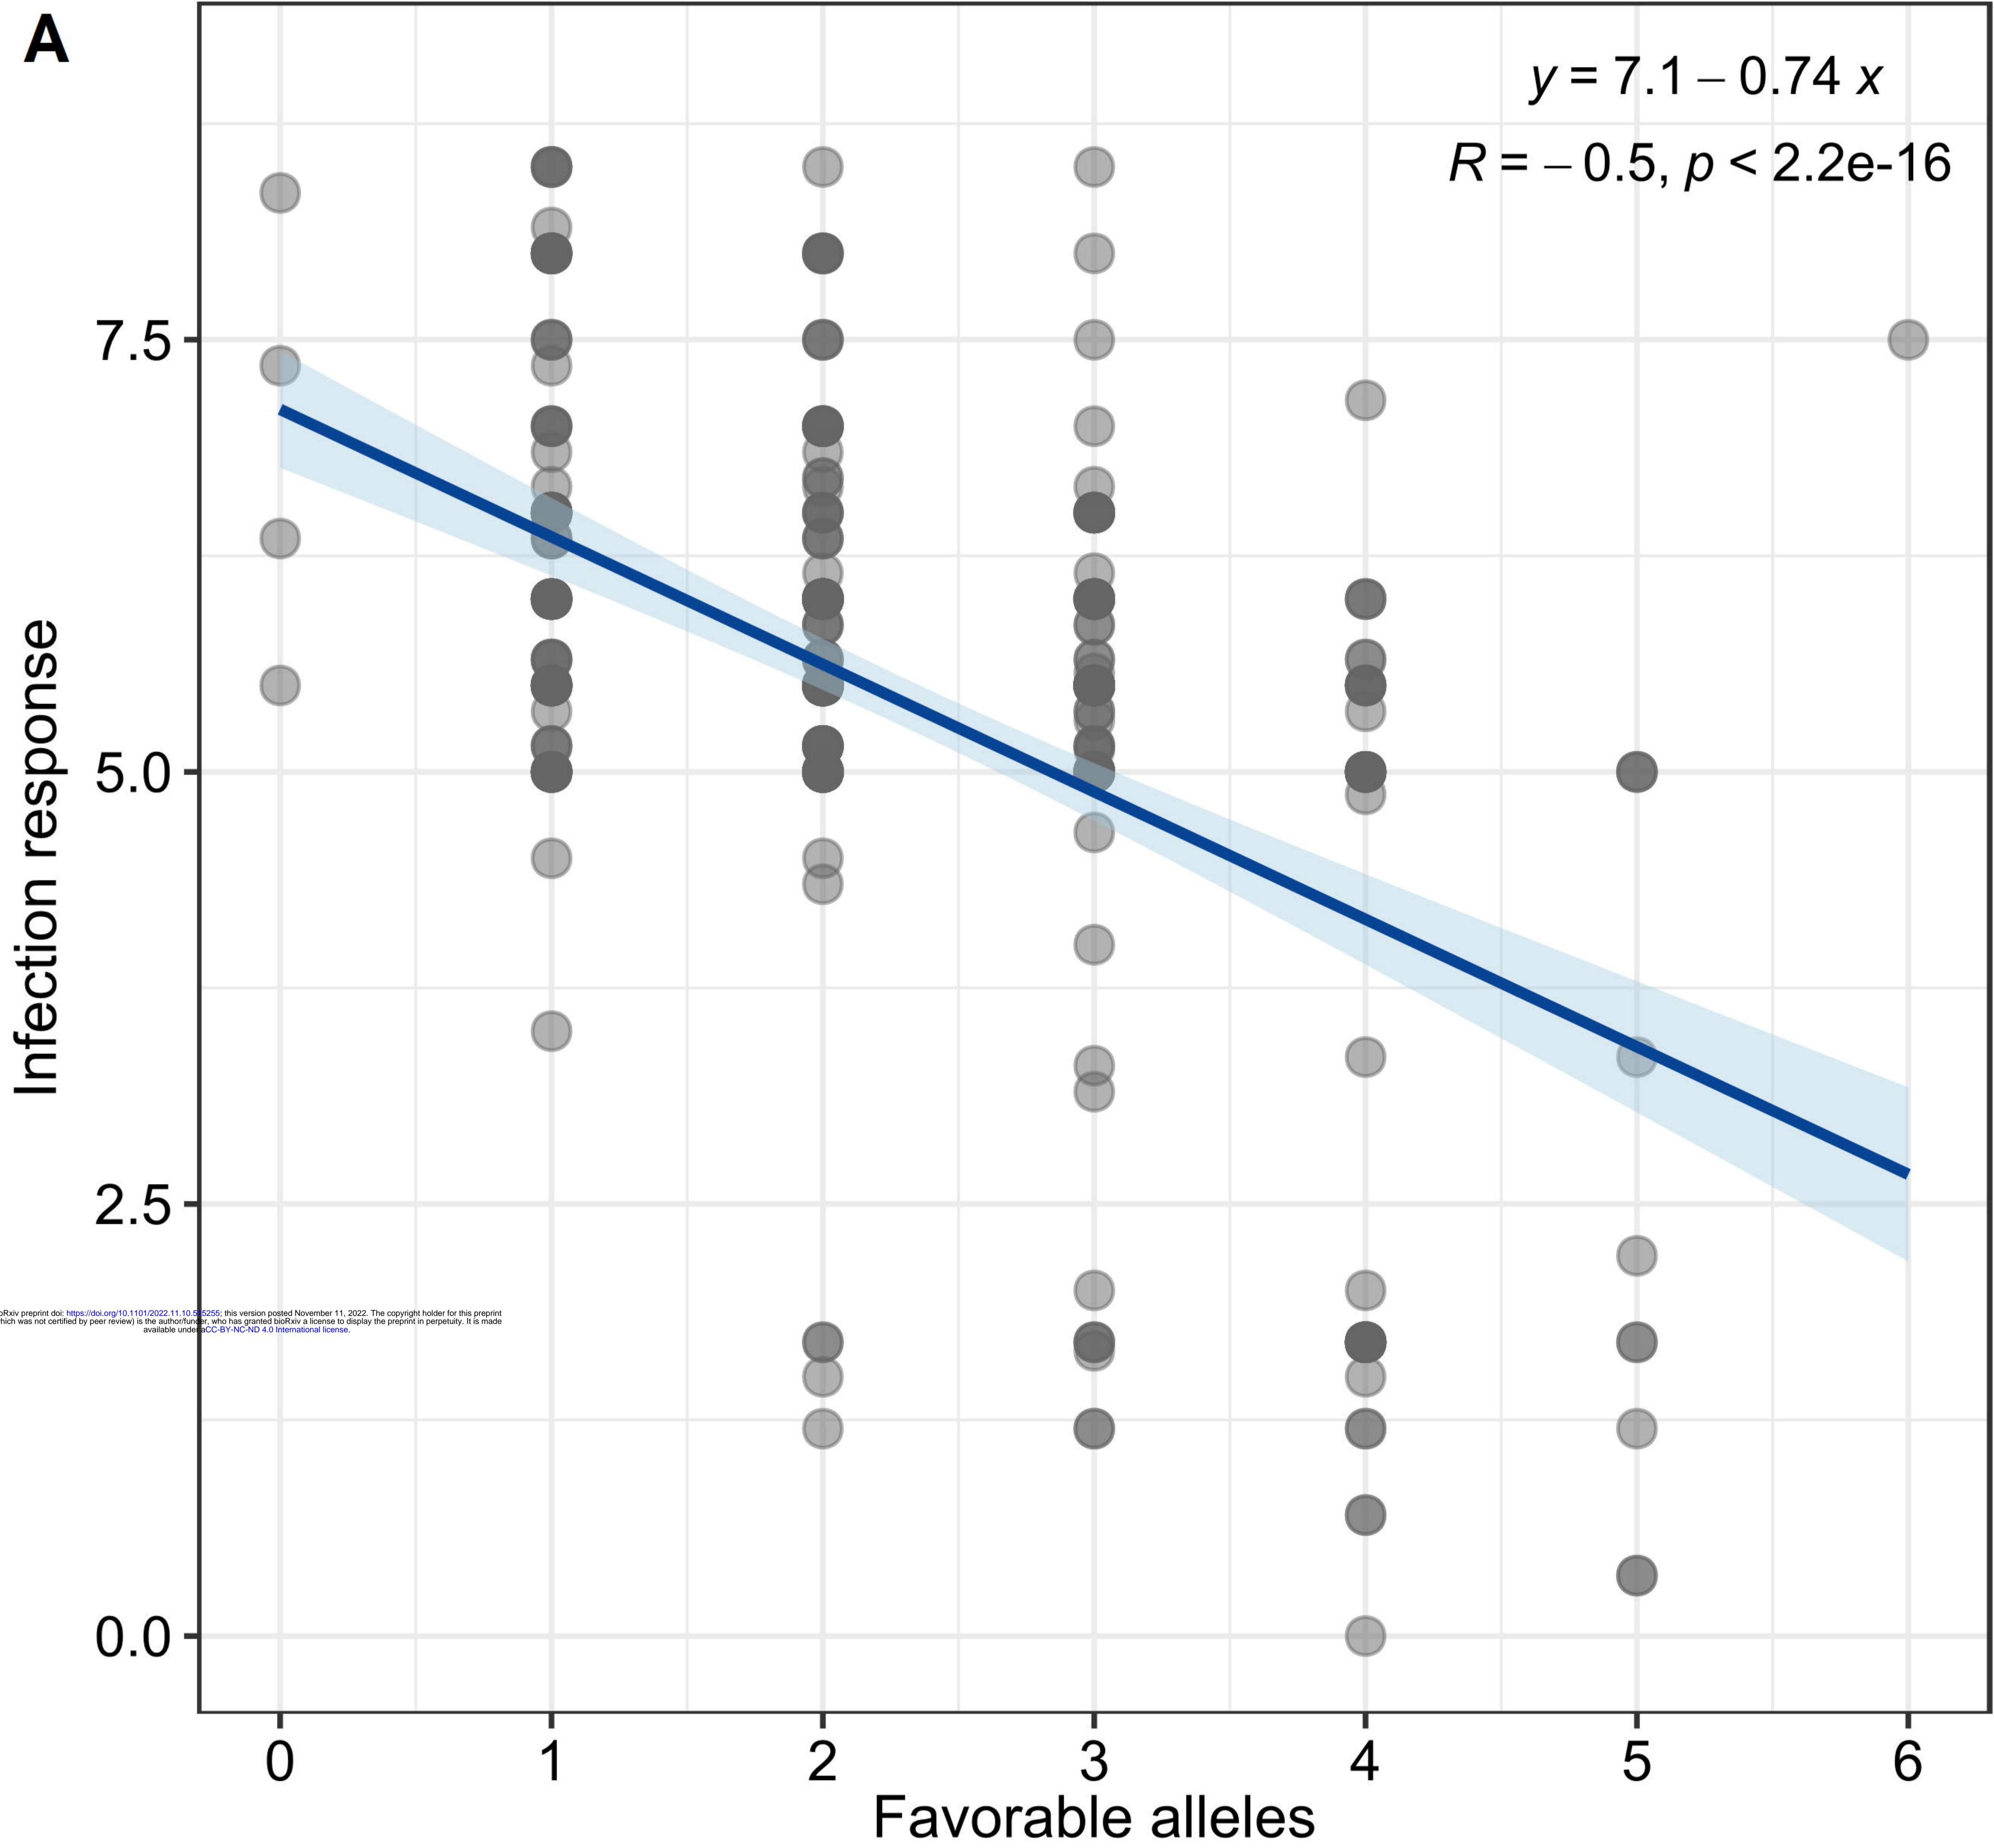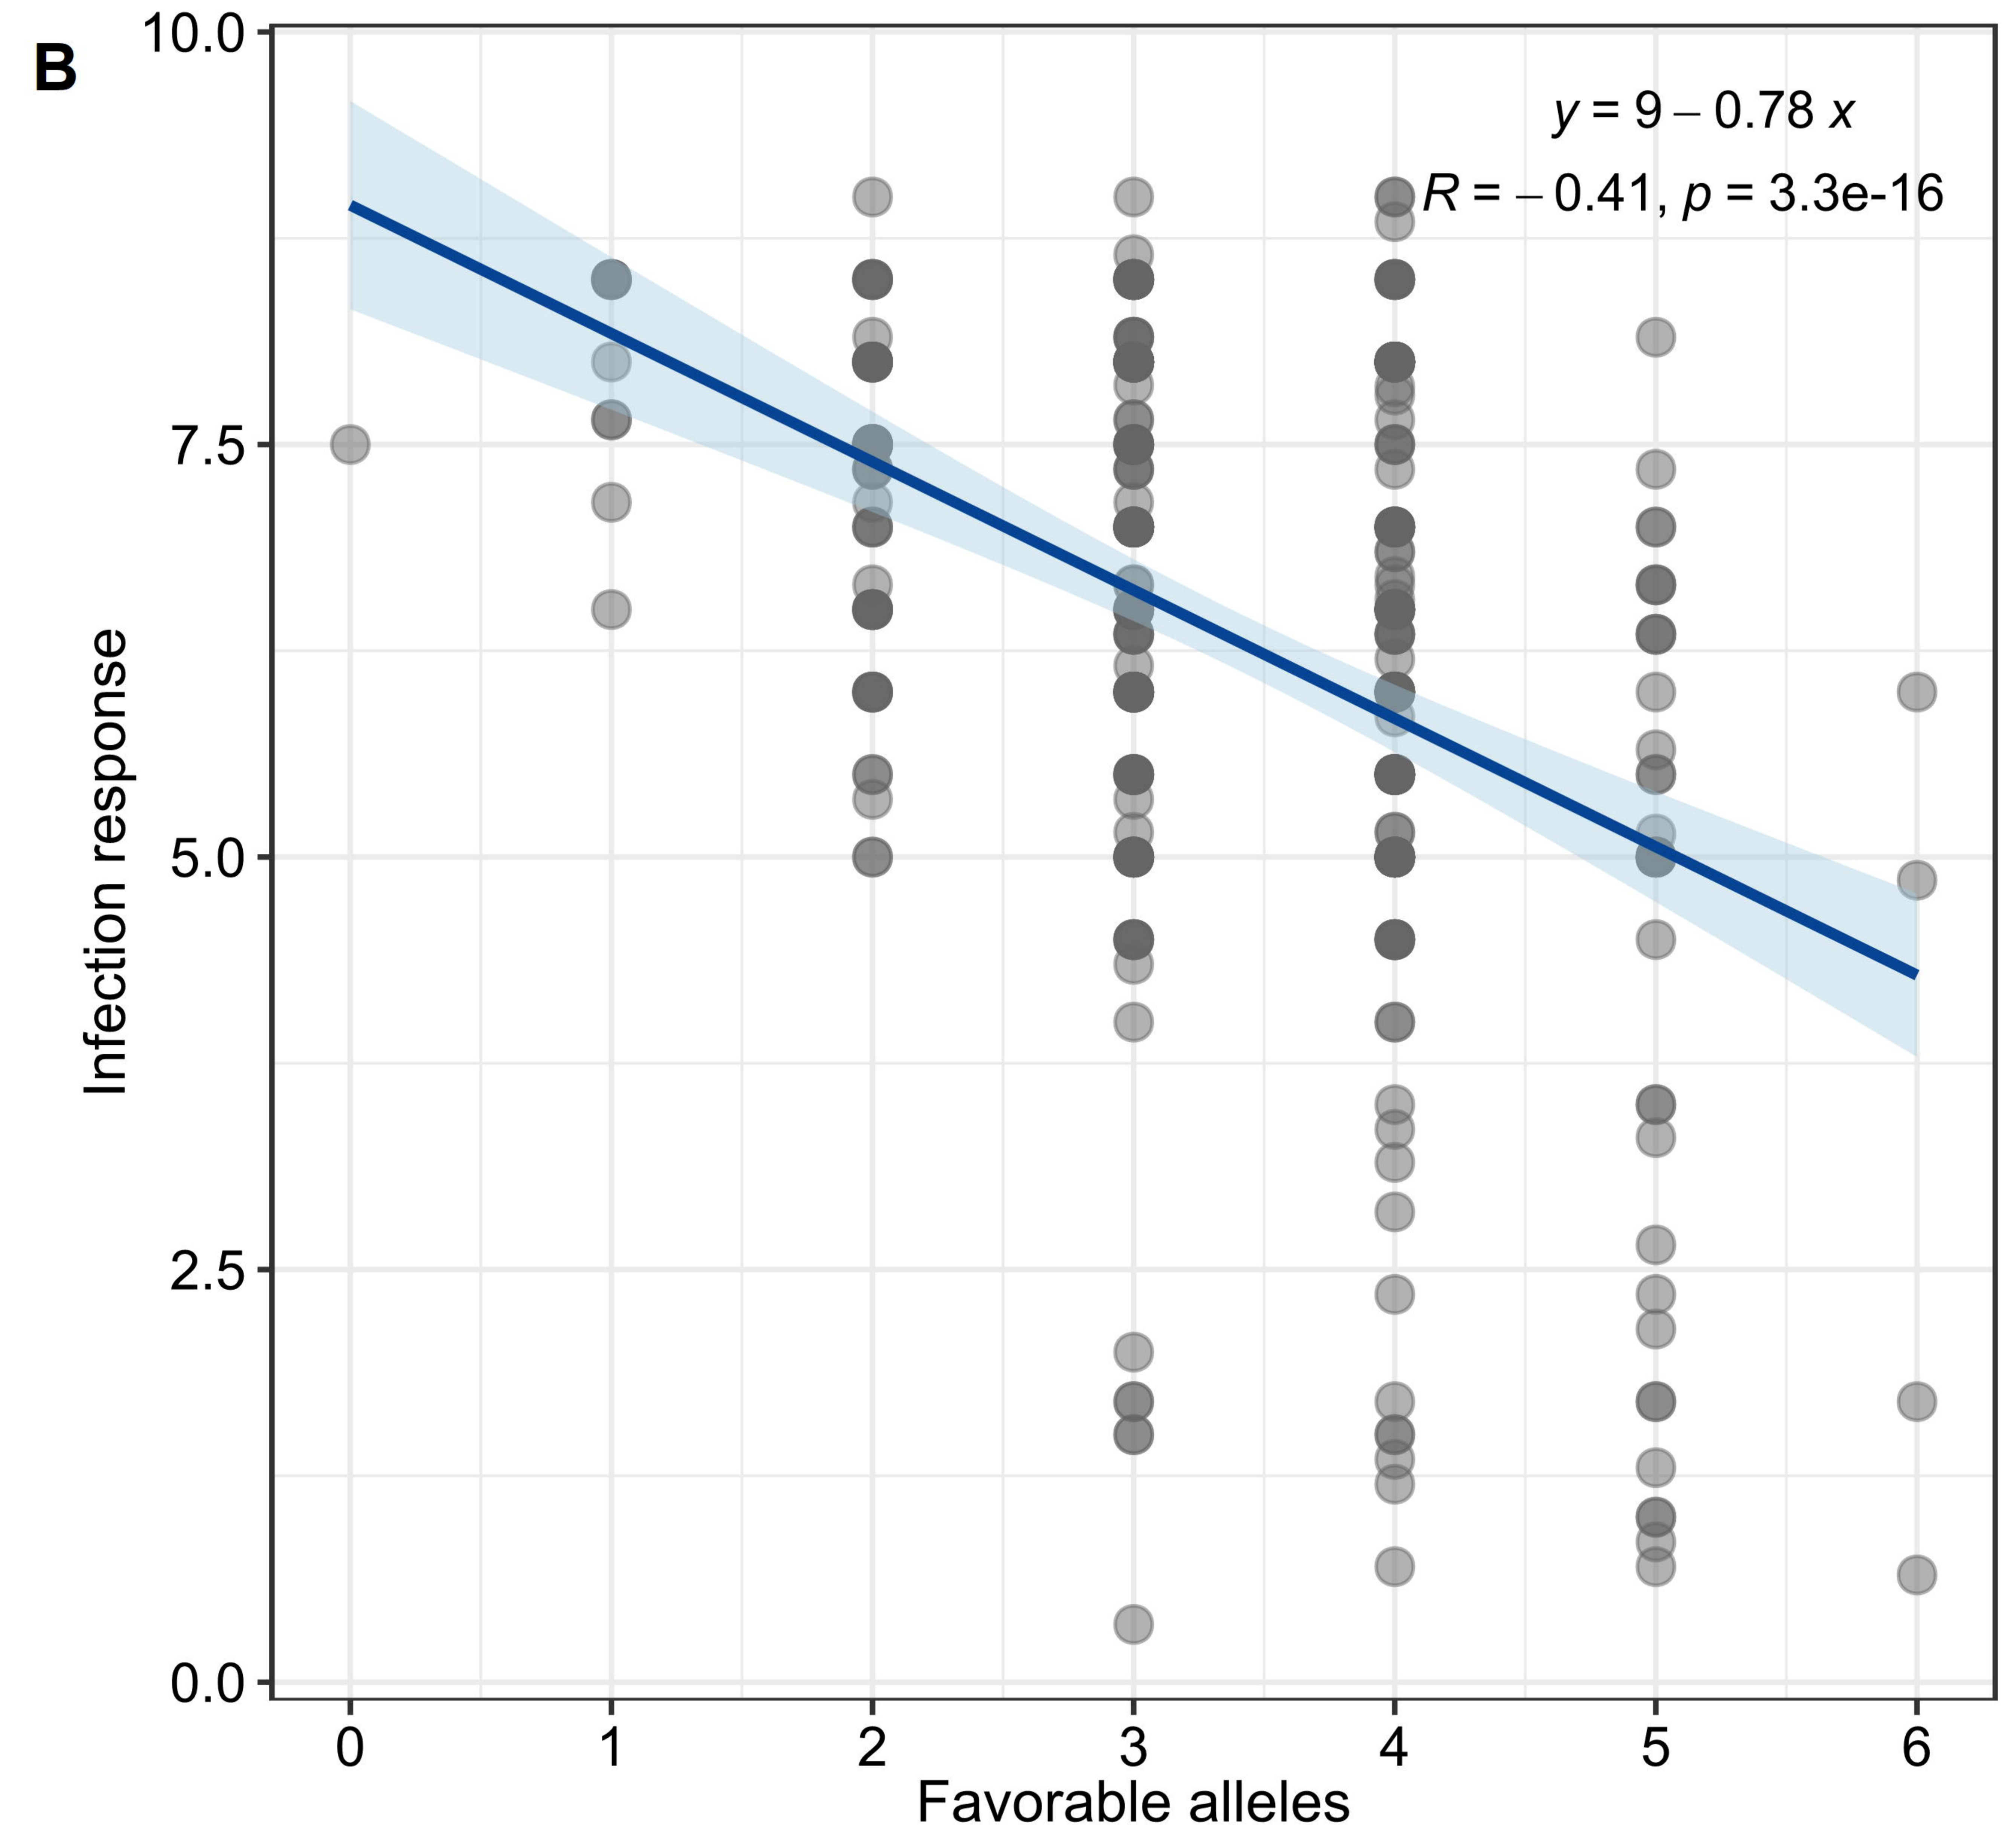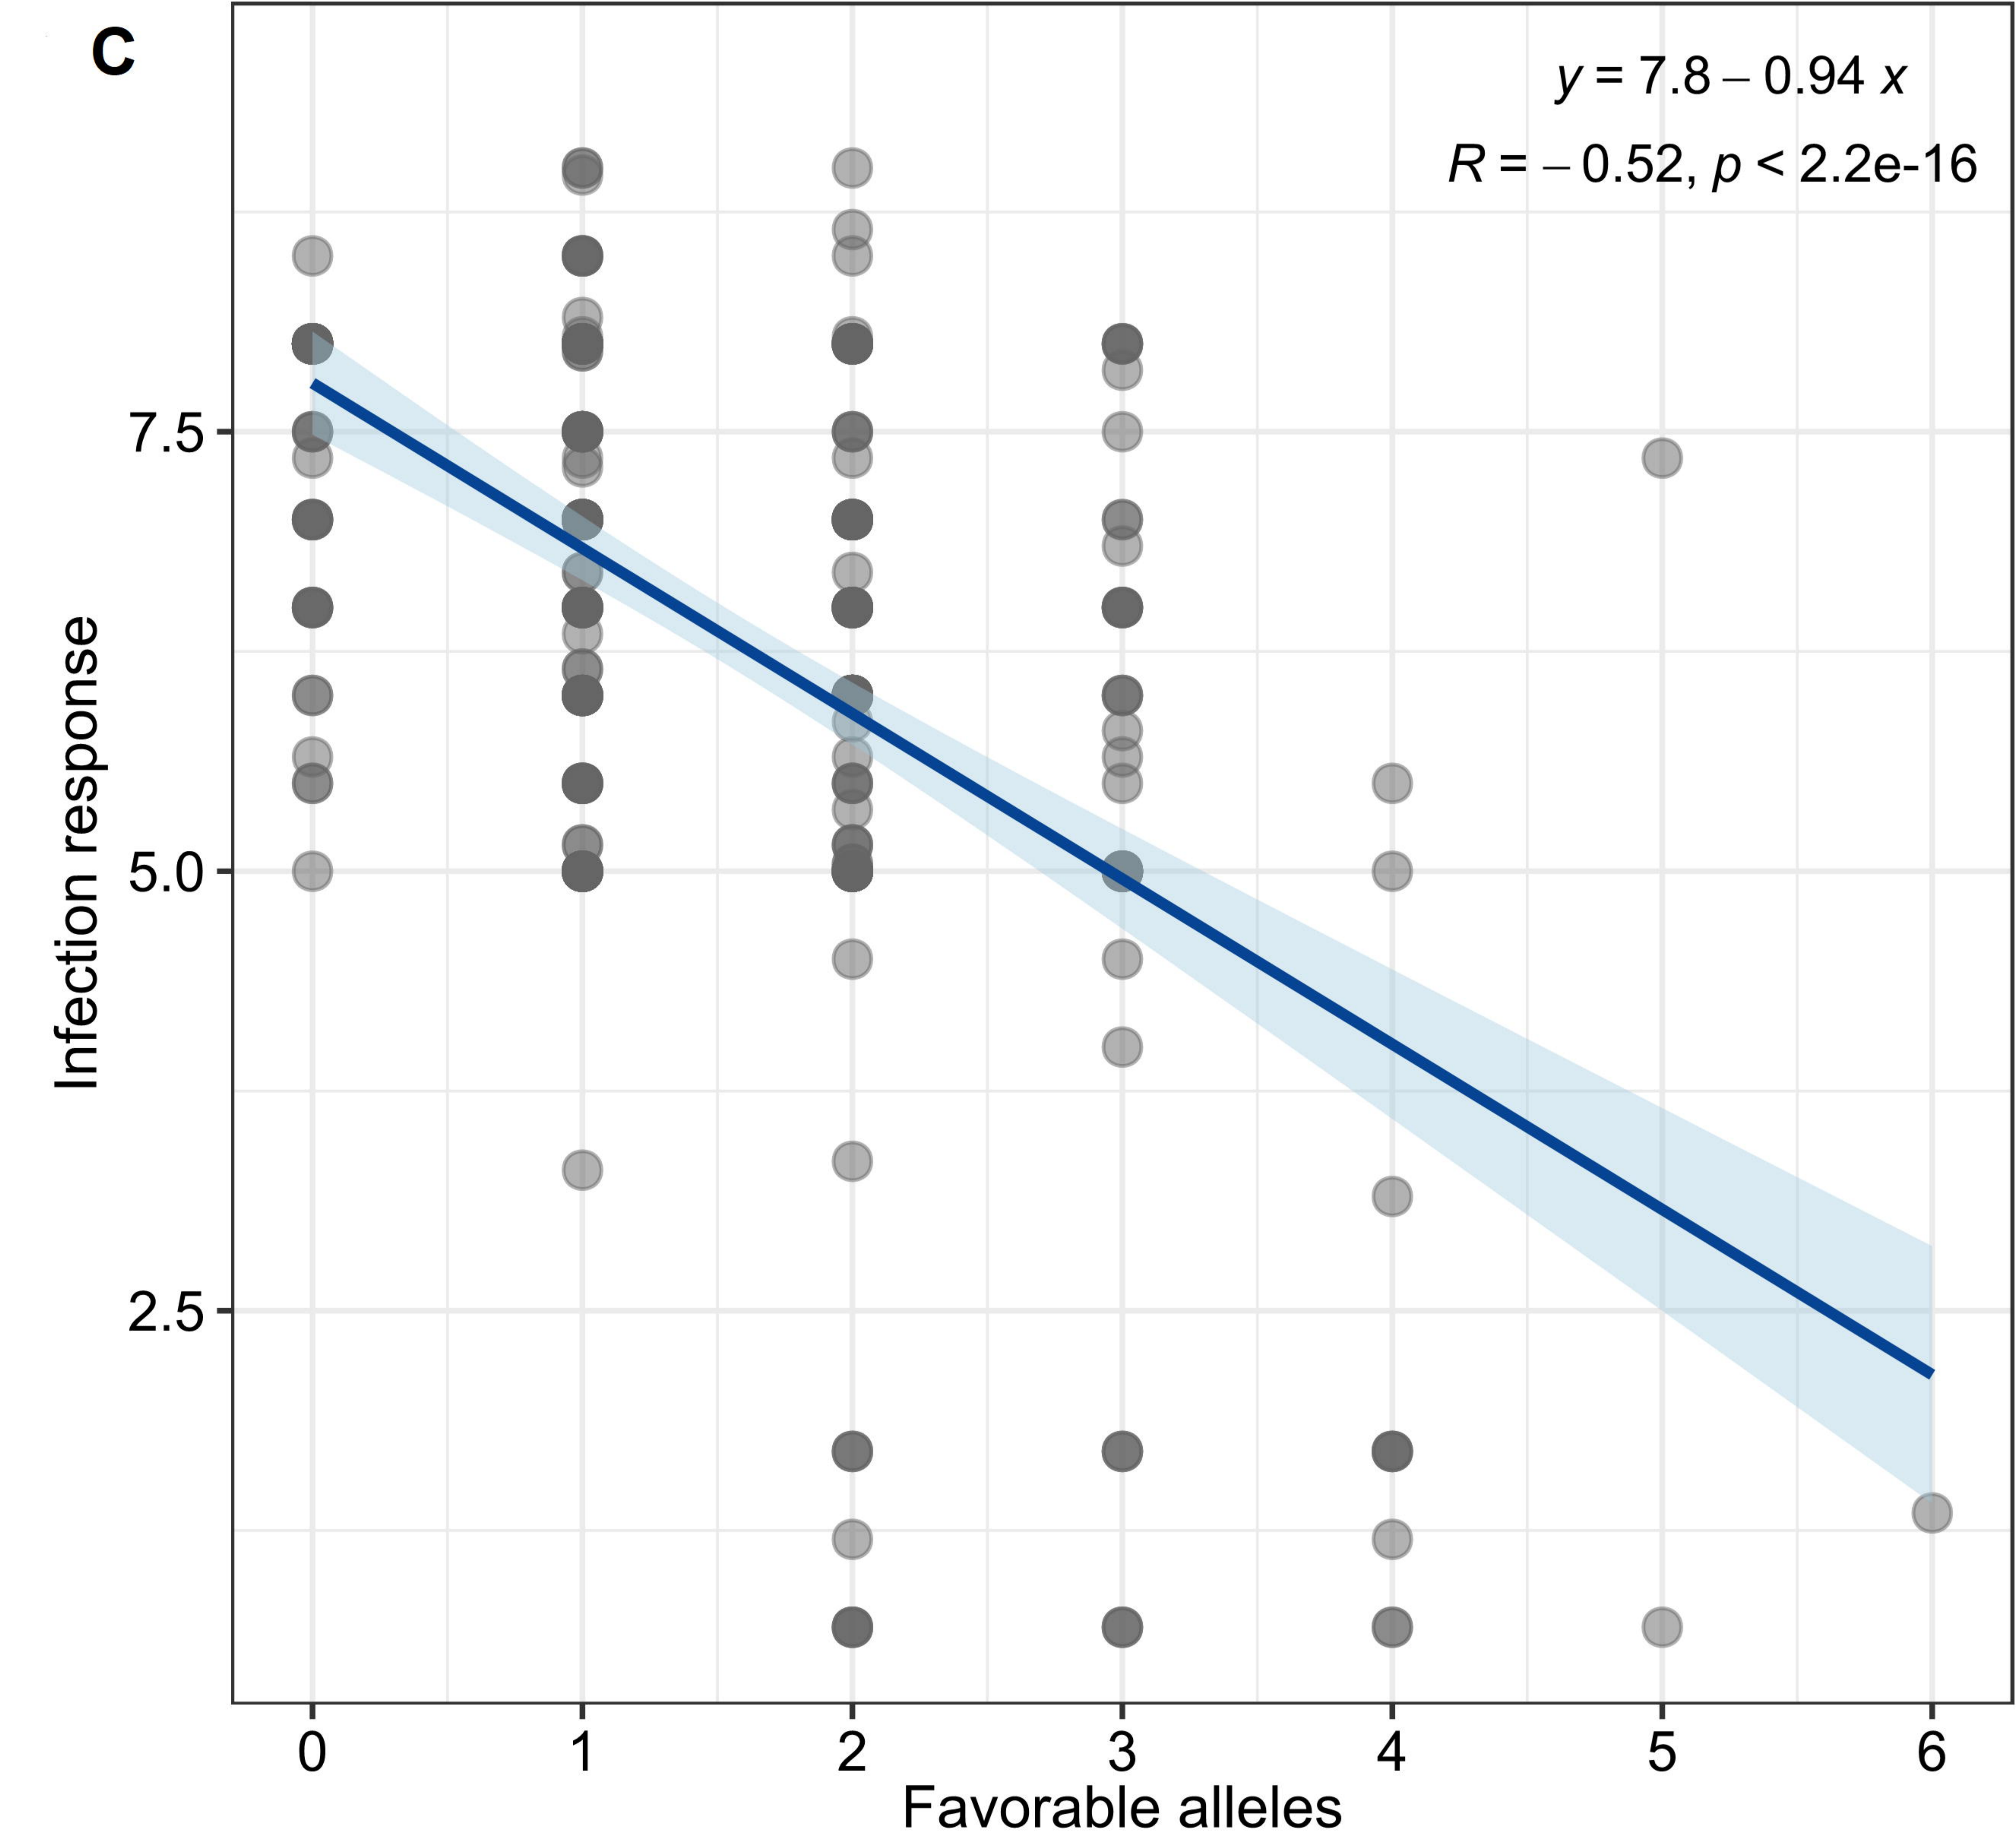

bioRxiv preprint doi: <https://doi.org/10.1101/2022.11.10.511001>; this version posted November 11, 2022. The copyright holder for this preprint (which was not certified by peer review) is the author/funder, who has granted bioRxiv a license to display the preprint in perpetuity. It is made available under aCC-BY-NC-ND 4.0 International license.

bioRxiv preprint doi: <https://doi.org/10.1101/2023.11.02.562016>; this version posted November 11, 2023. The copyright holder for this preprint (which was not certified by peer review) is the author/funder, who has granted bioRxiv a license to display the preprint in perpetuity. It is made available under aCC-BY-NC-ND 4.0 International license.

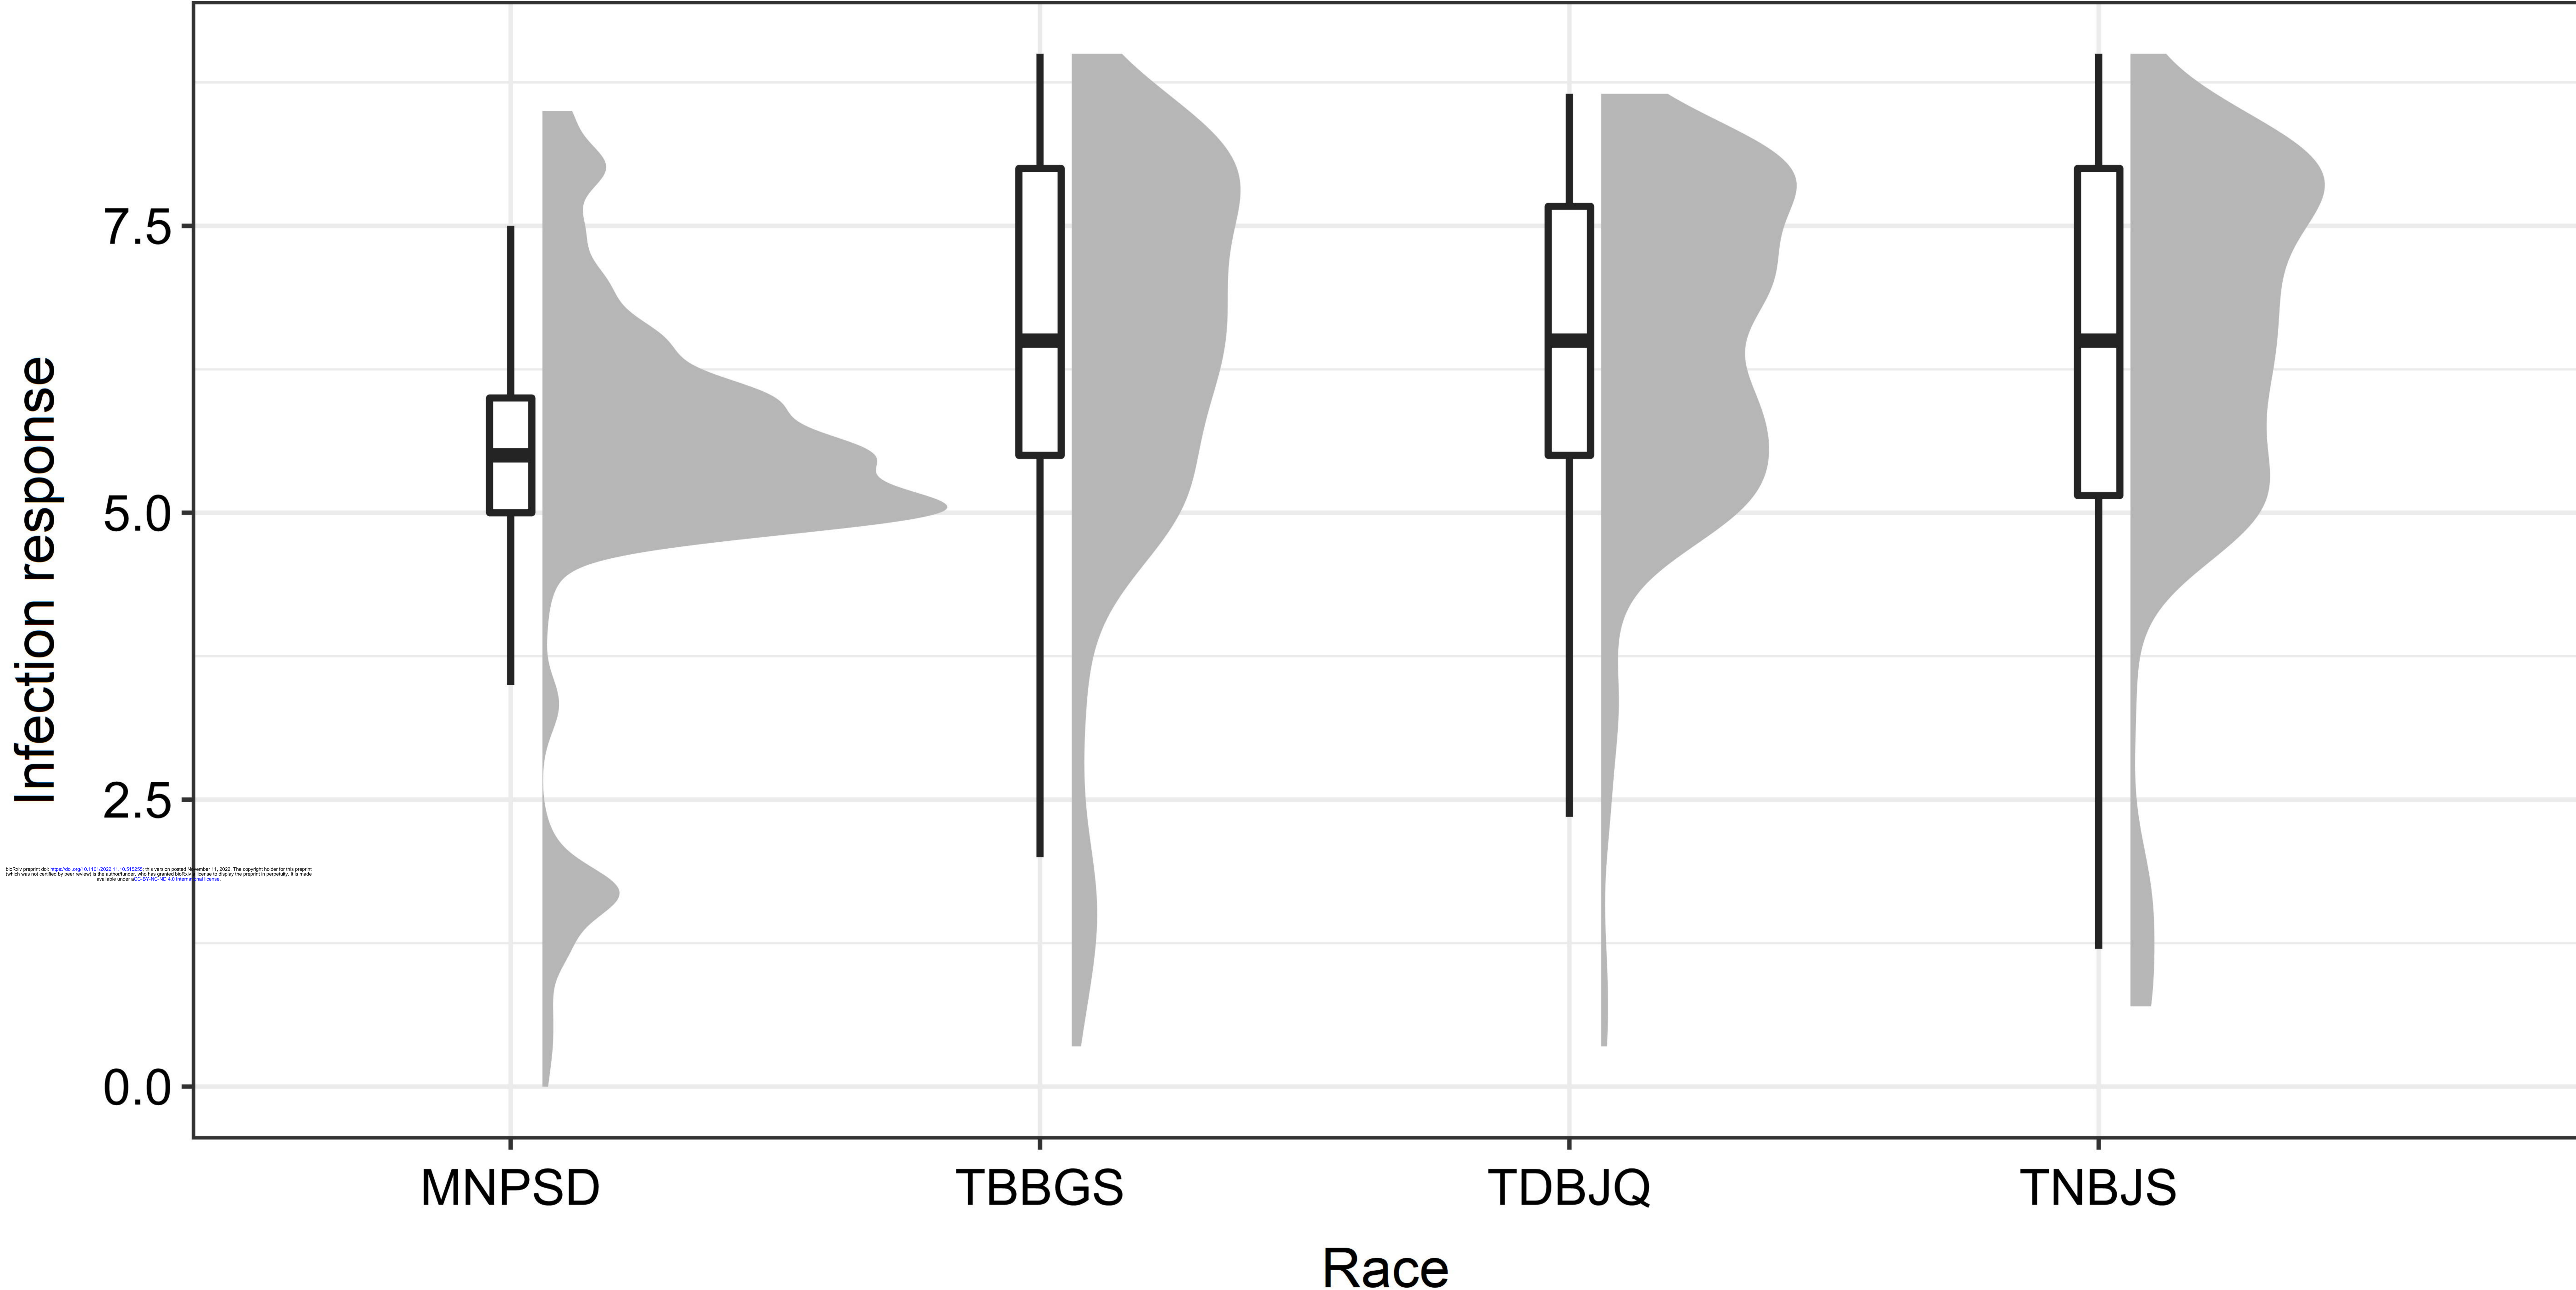

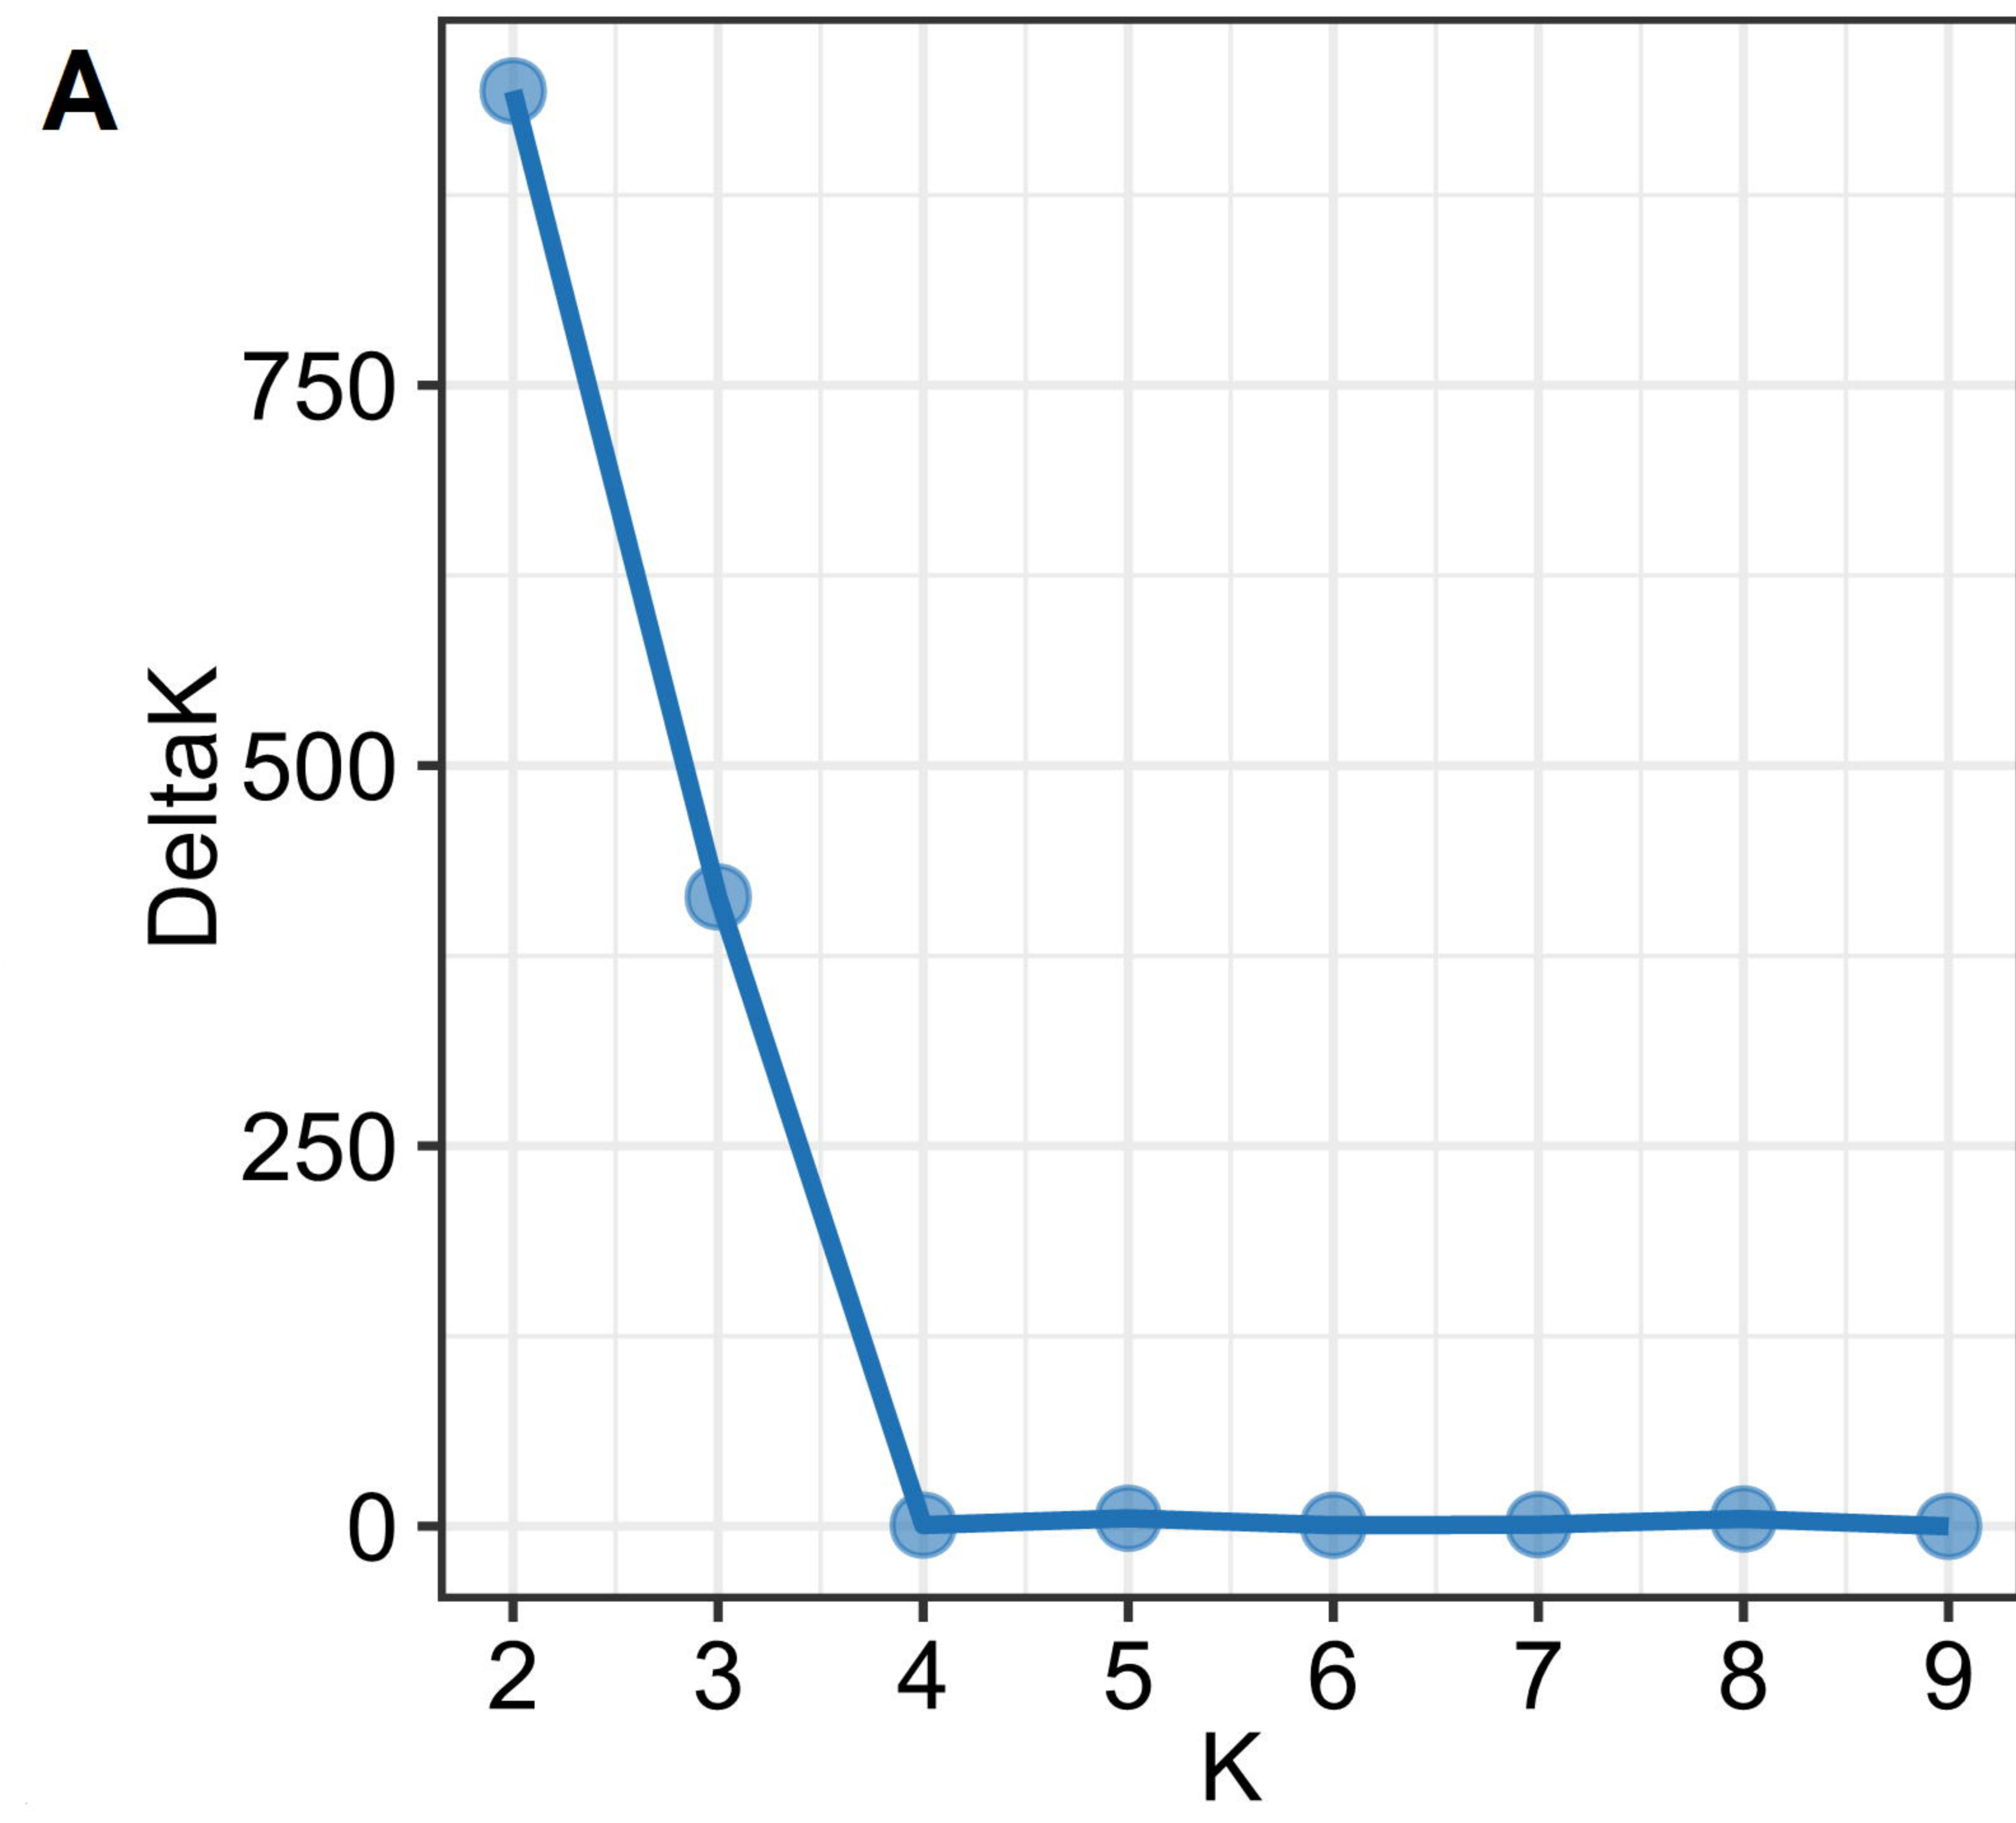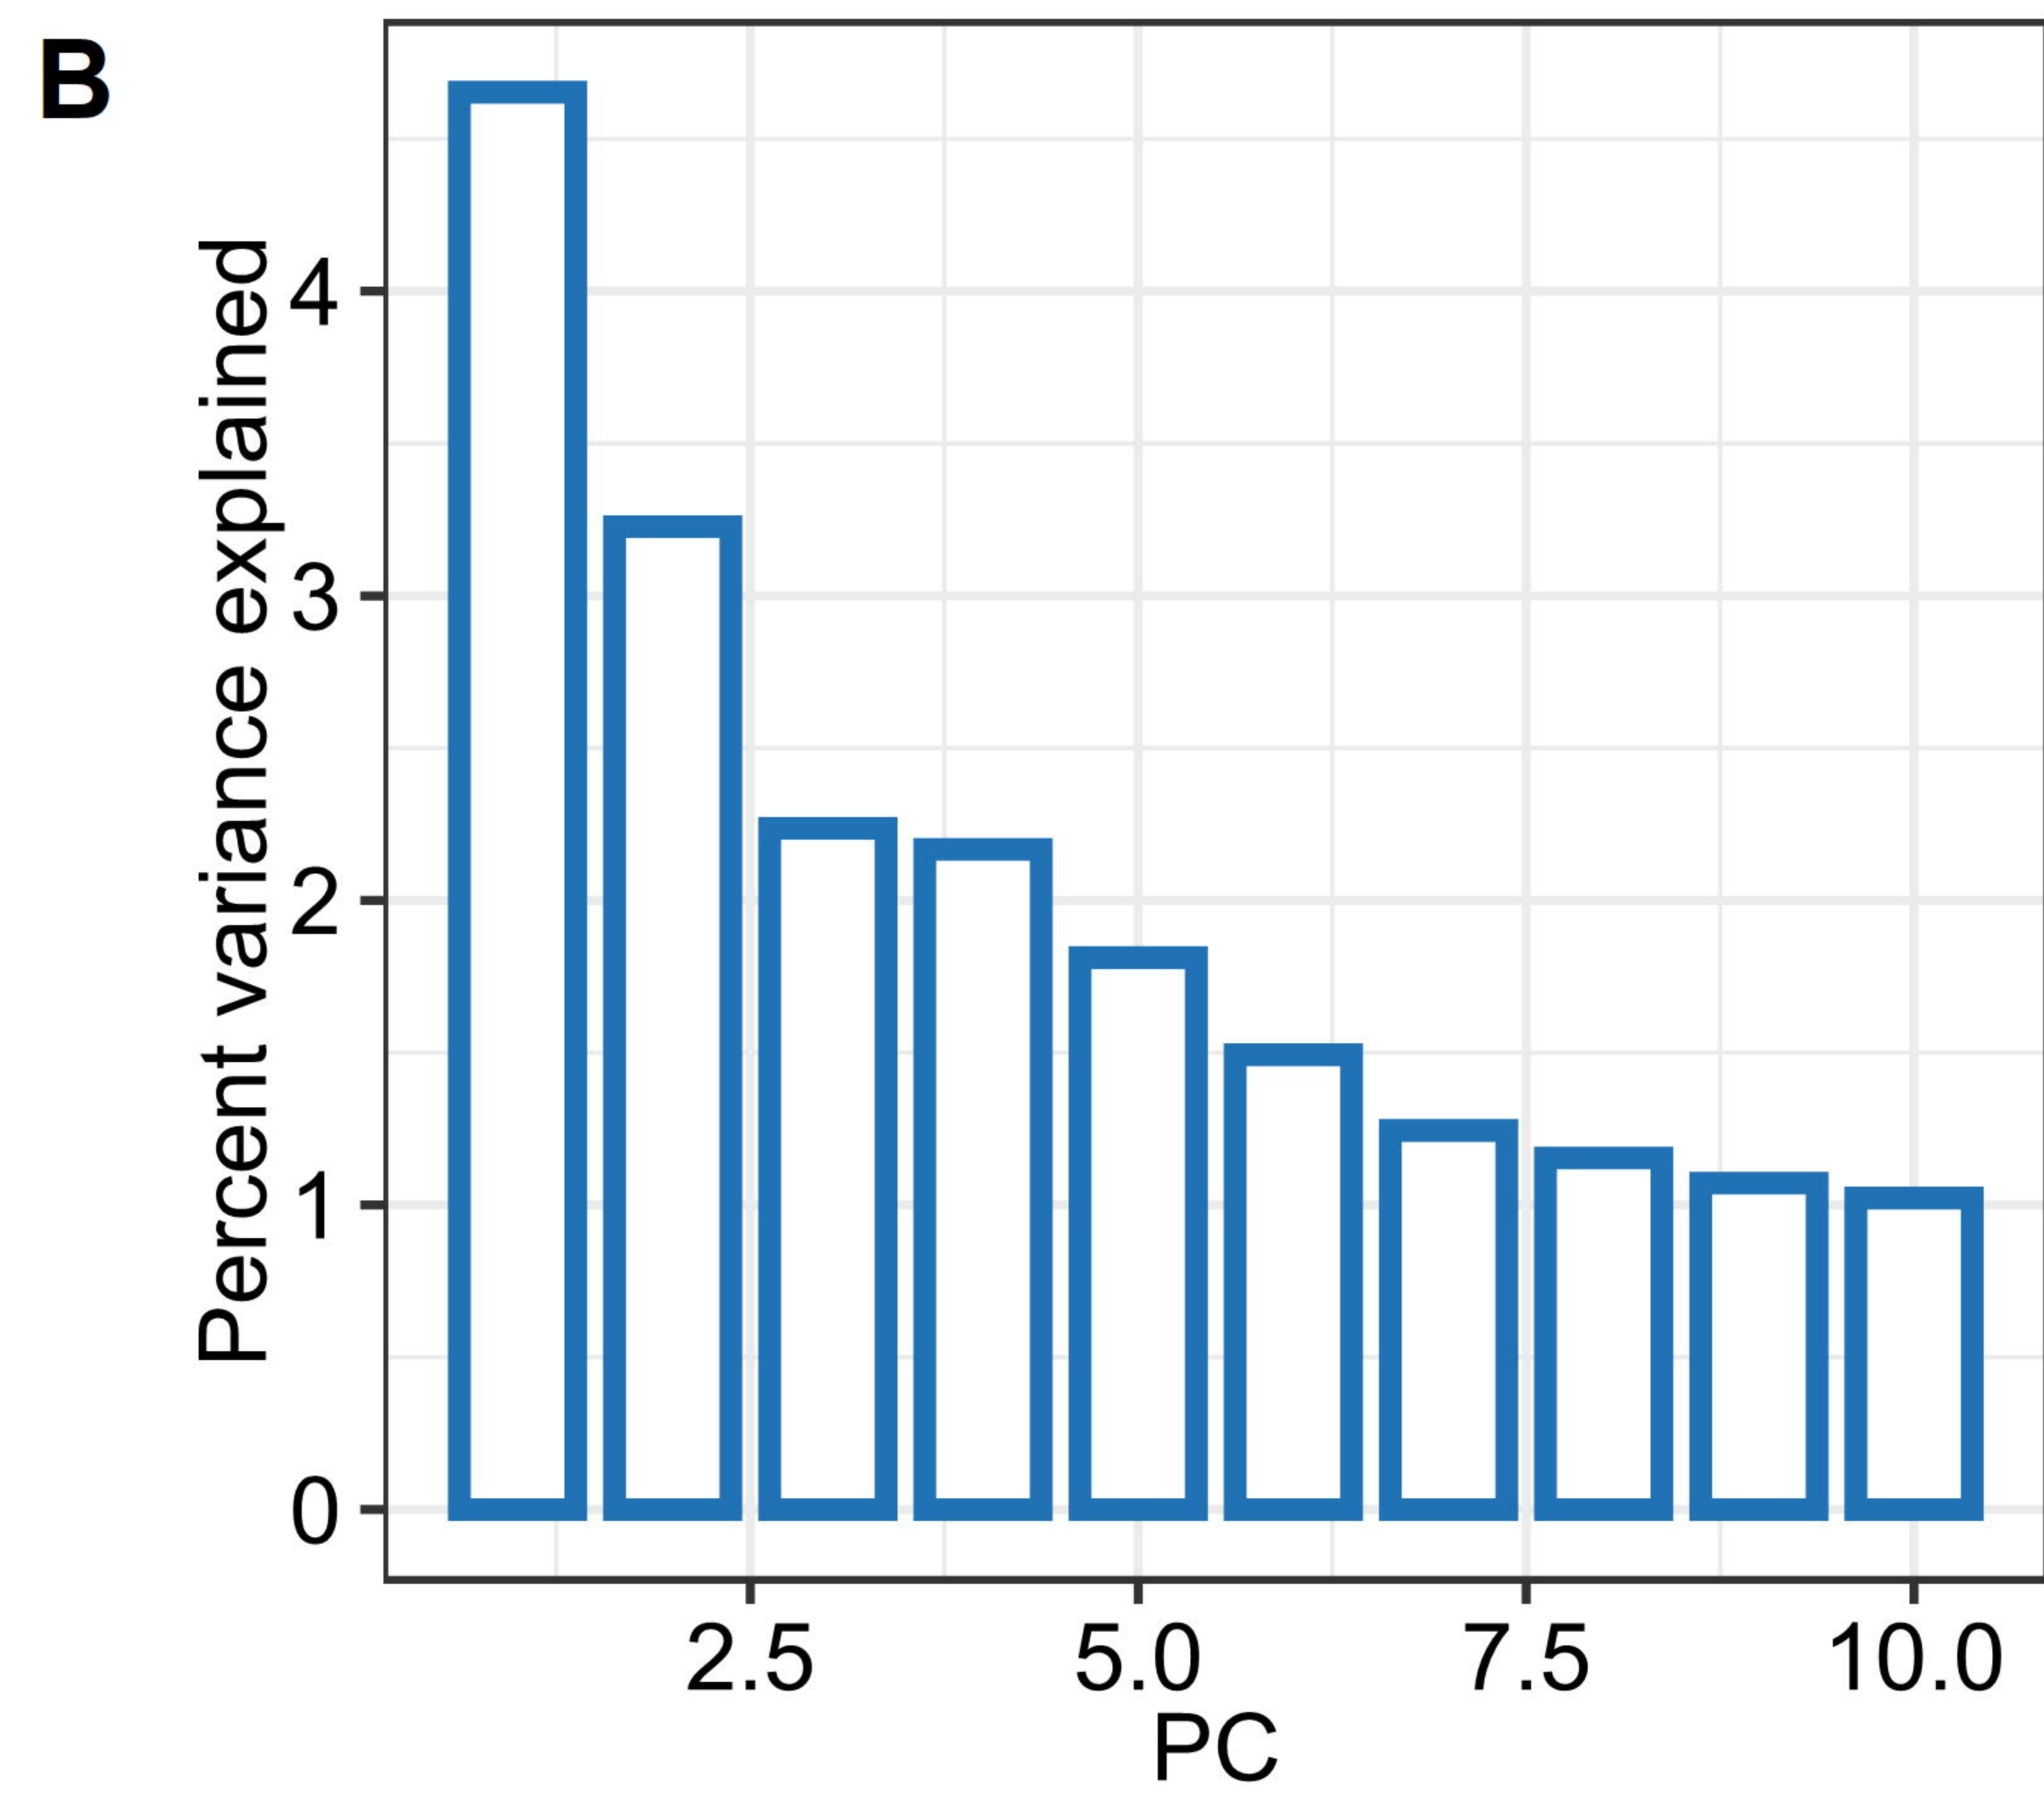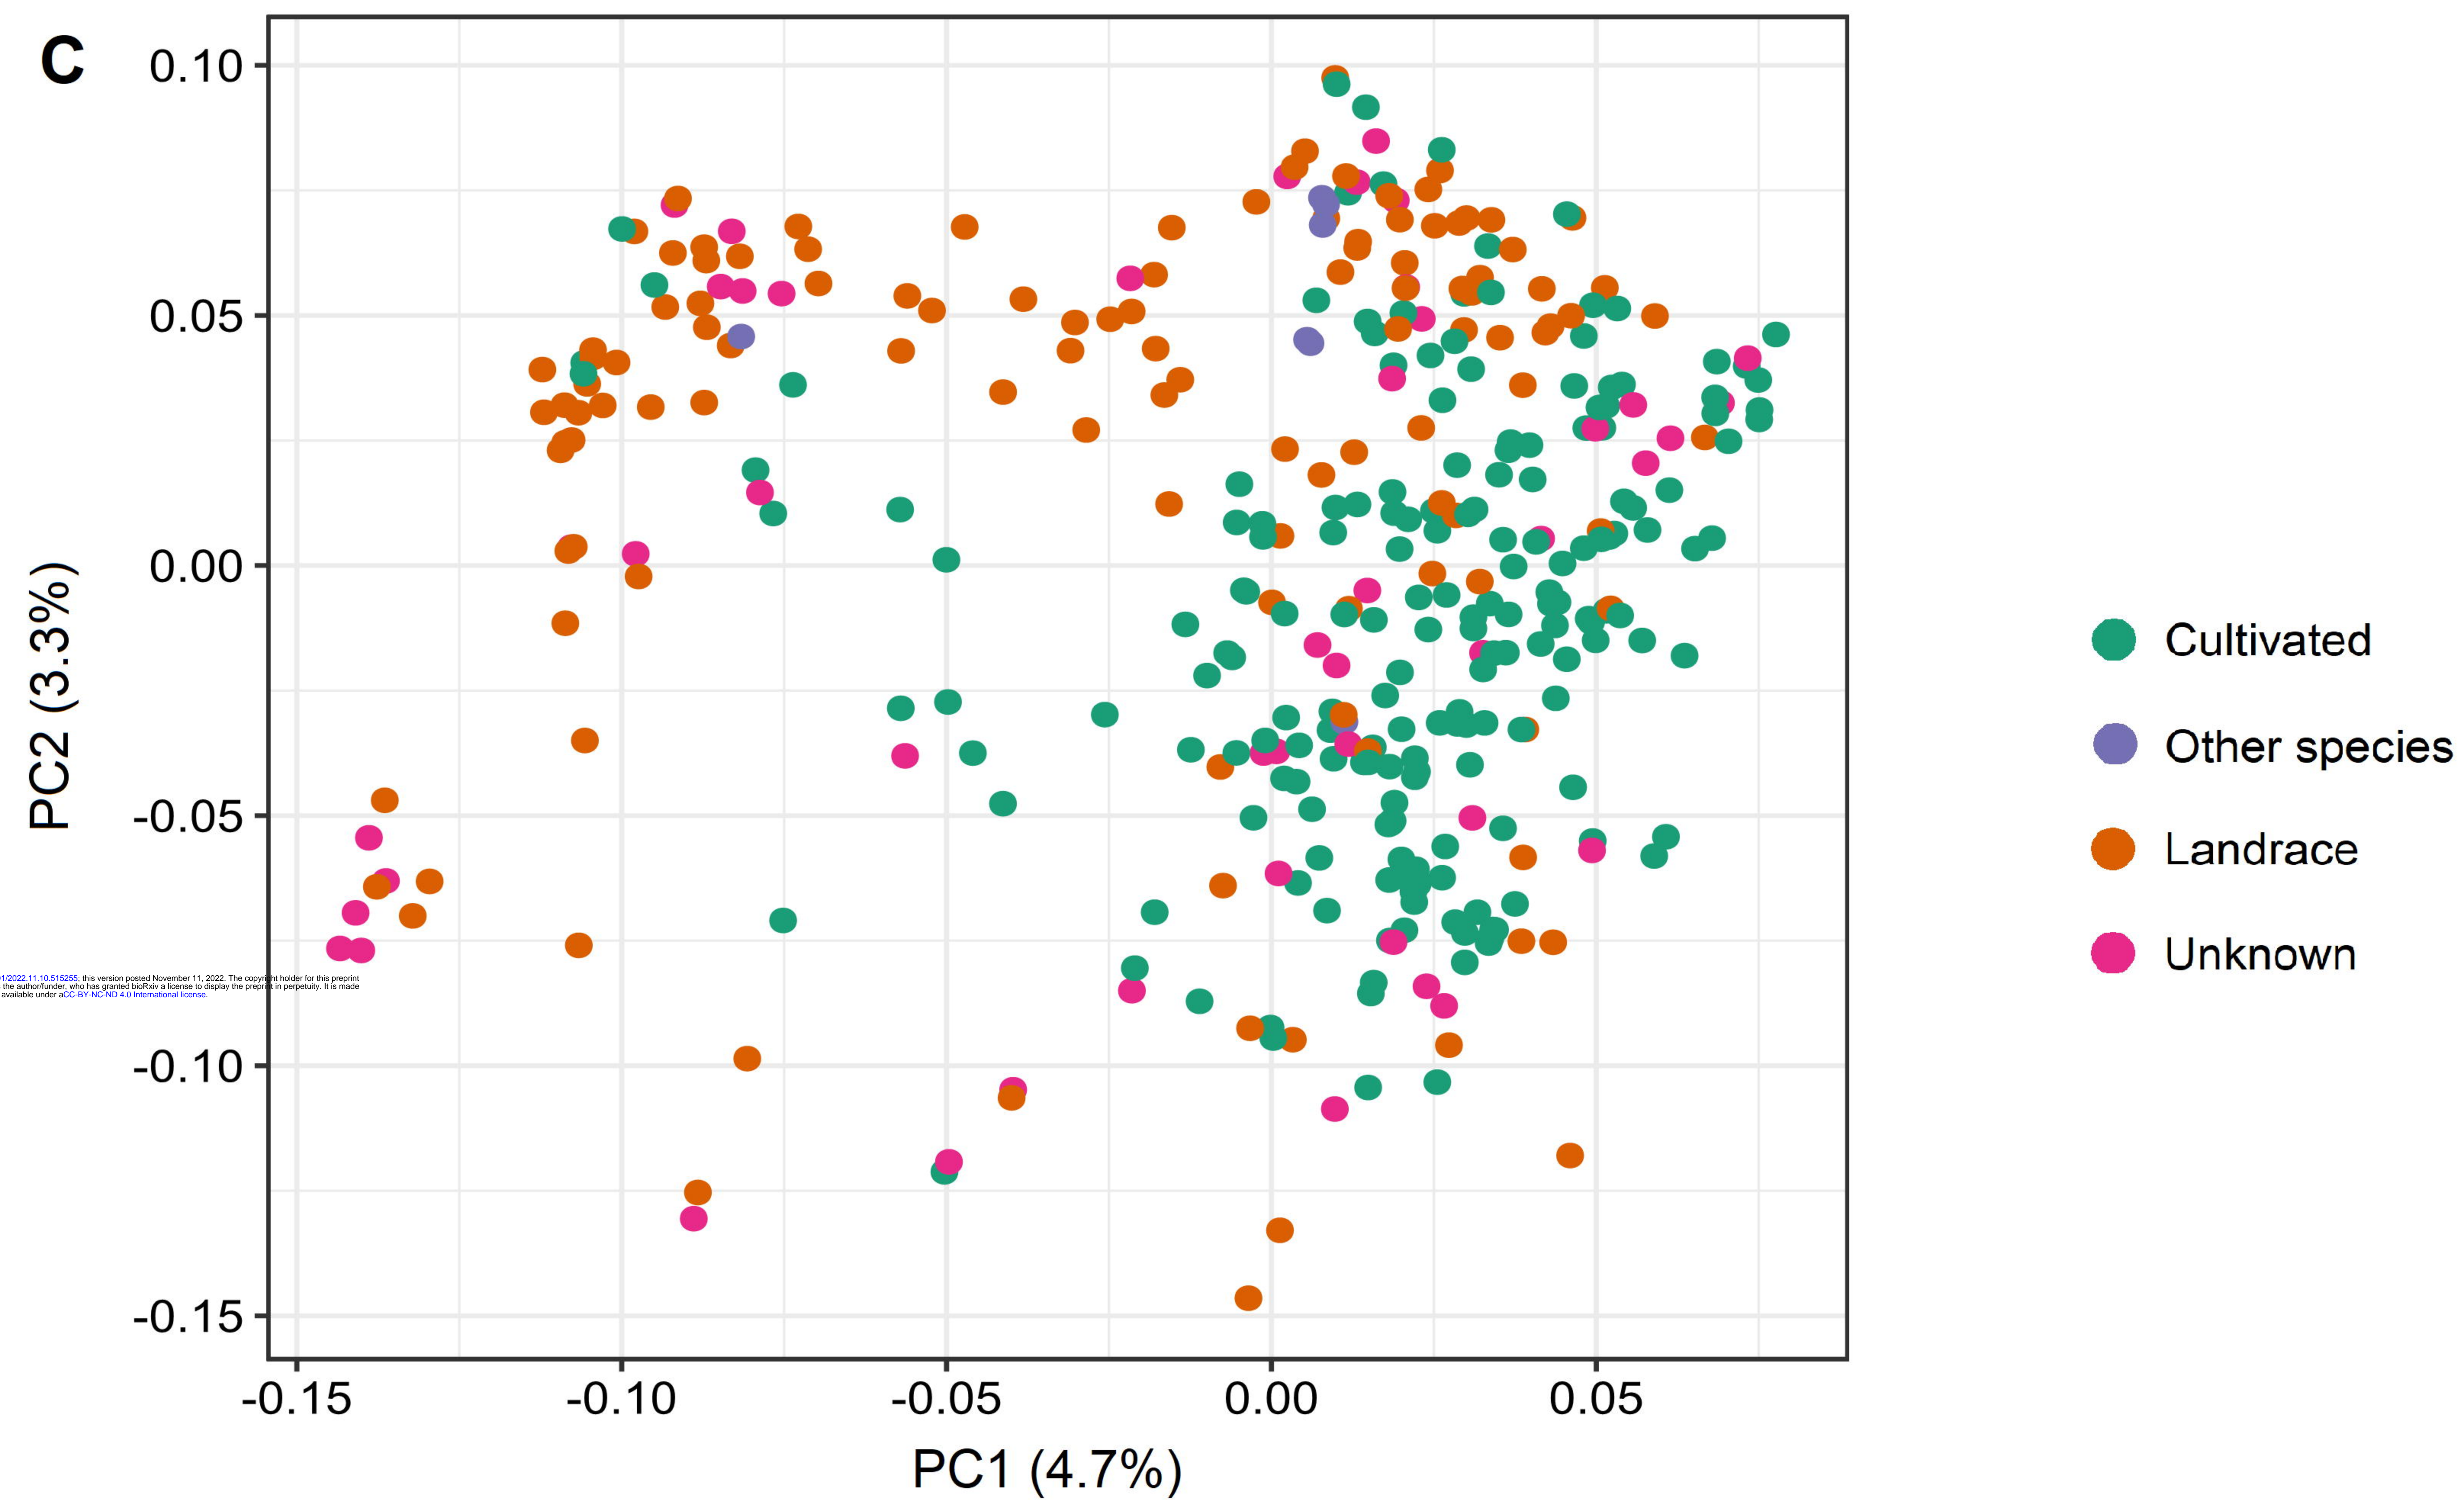

**A**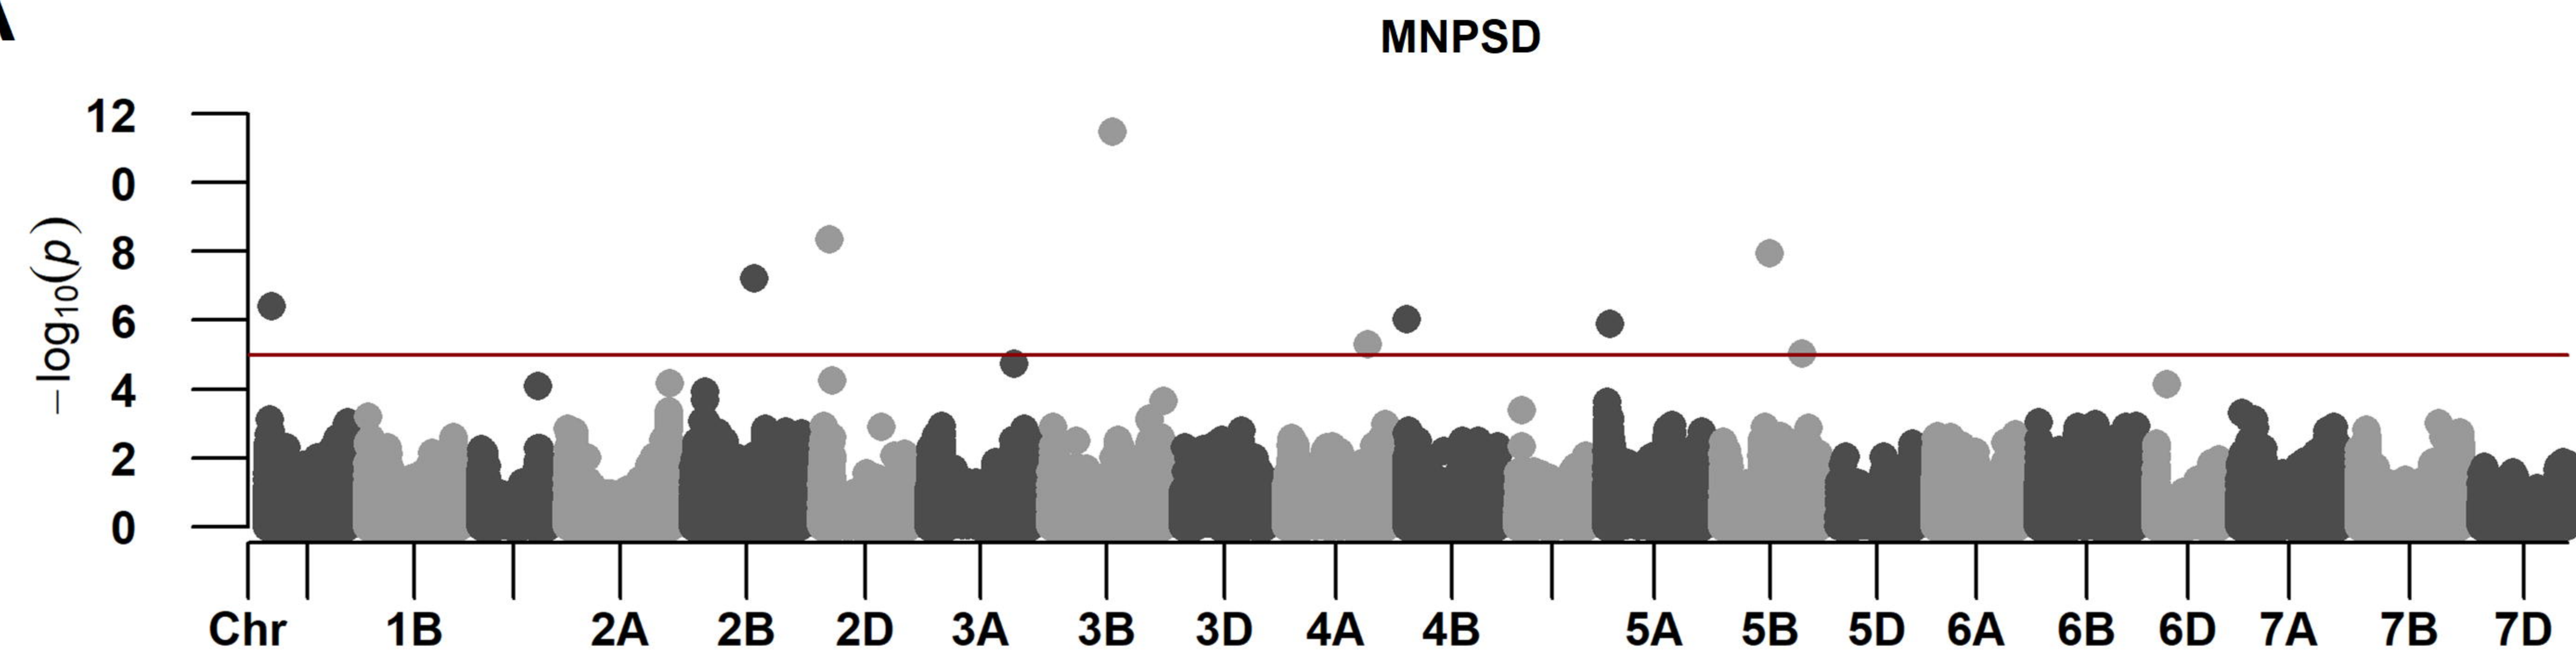

bioRxiv preprint doi: <https://doi.org/10.1101/2022.11.10.515255>; this version posted November 11, 2022. The copyright holder for this preprint (which was not certified by peer review) is the author/funder, who has granted bioRxiv a license to display the preprint in perpetuity. It is made available under aCC-BY-NC-ND 4.0 International license.

**B**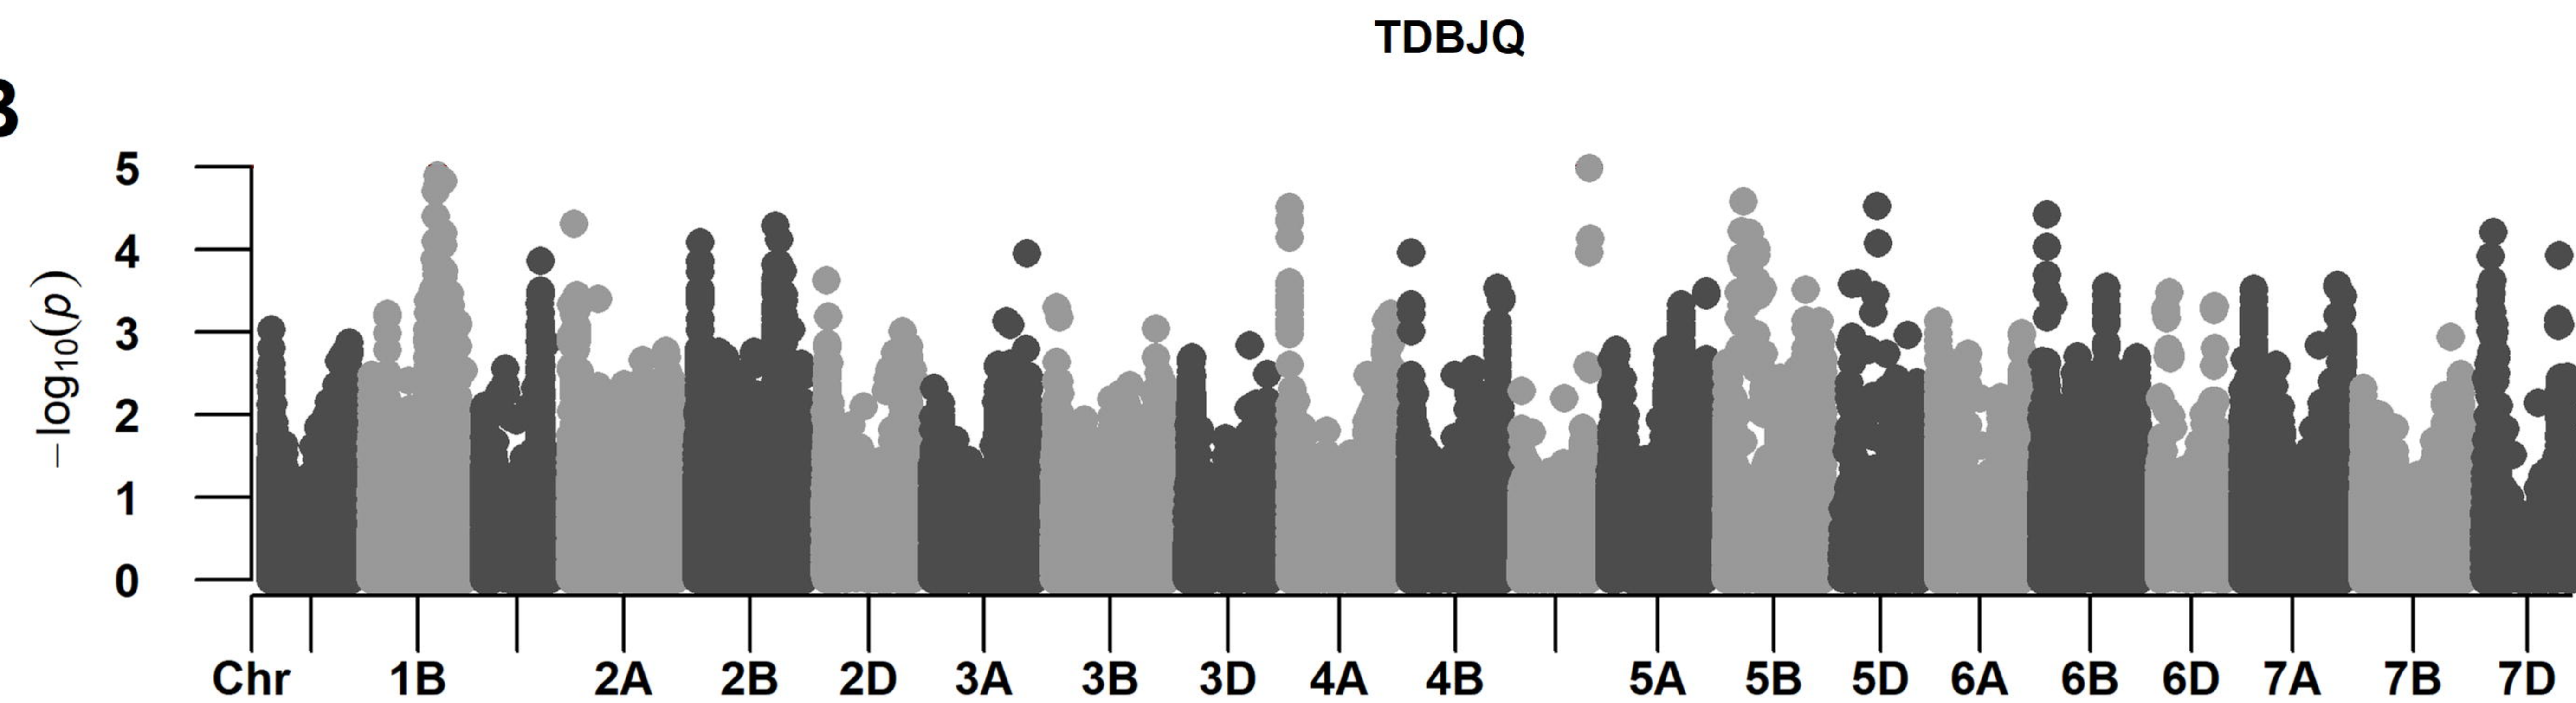**C**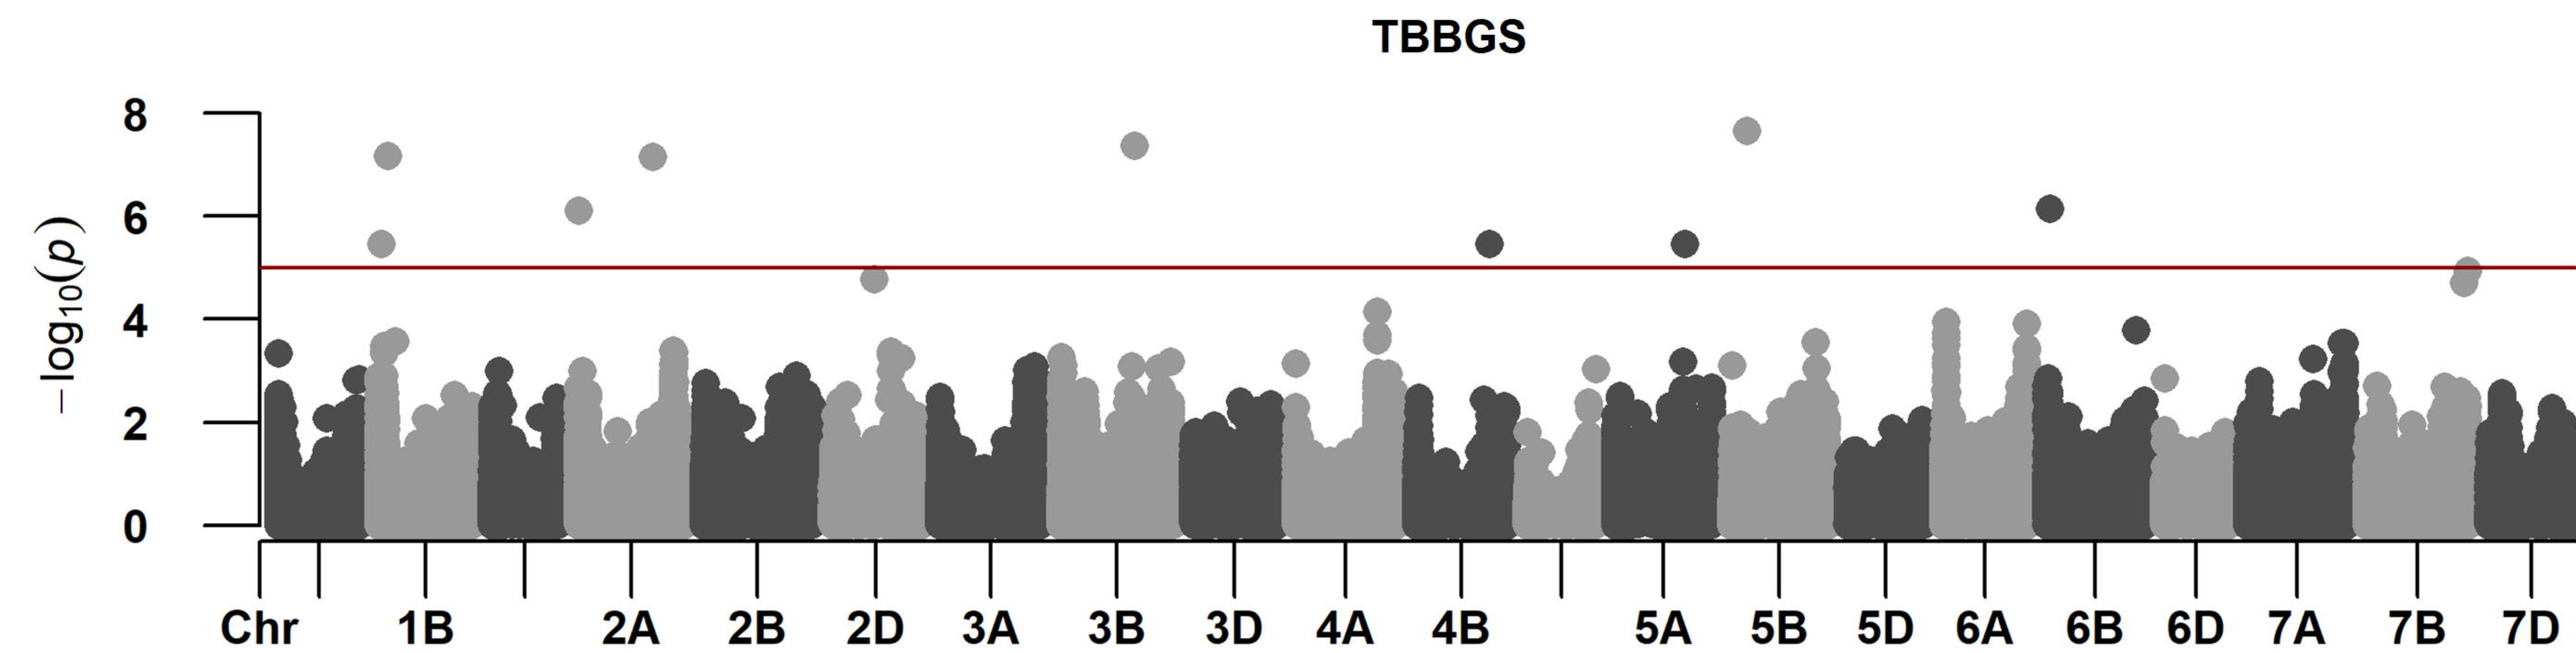**D**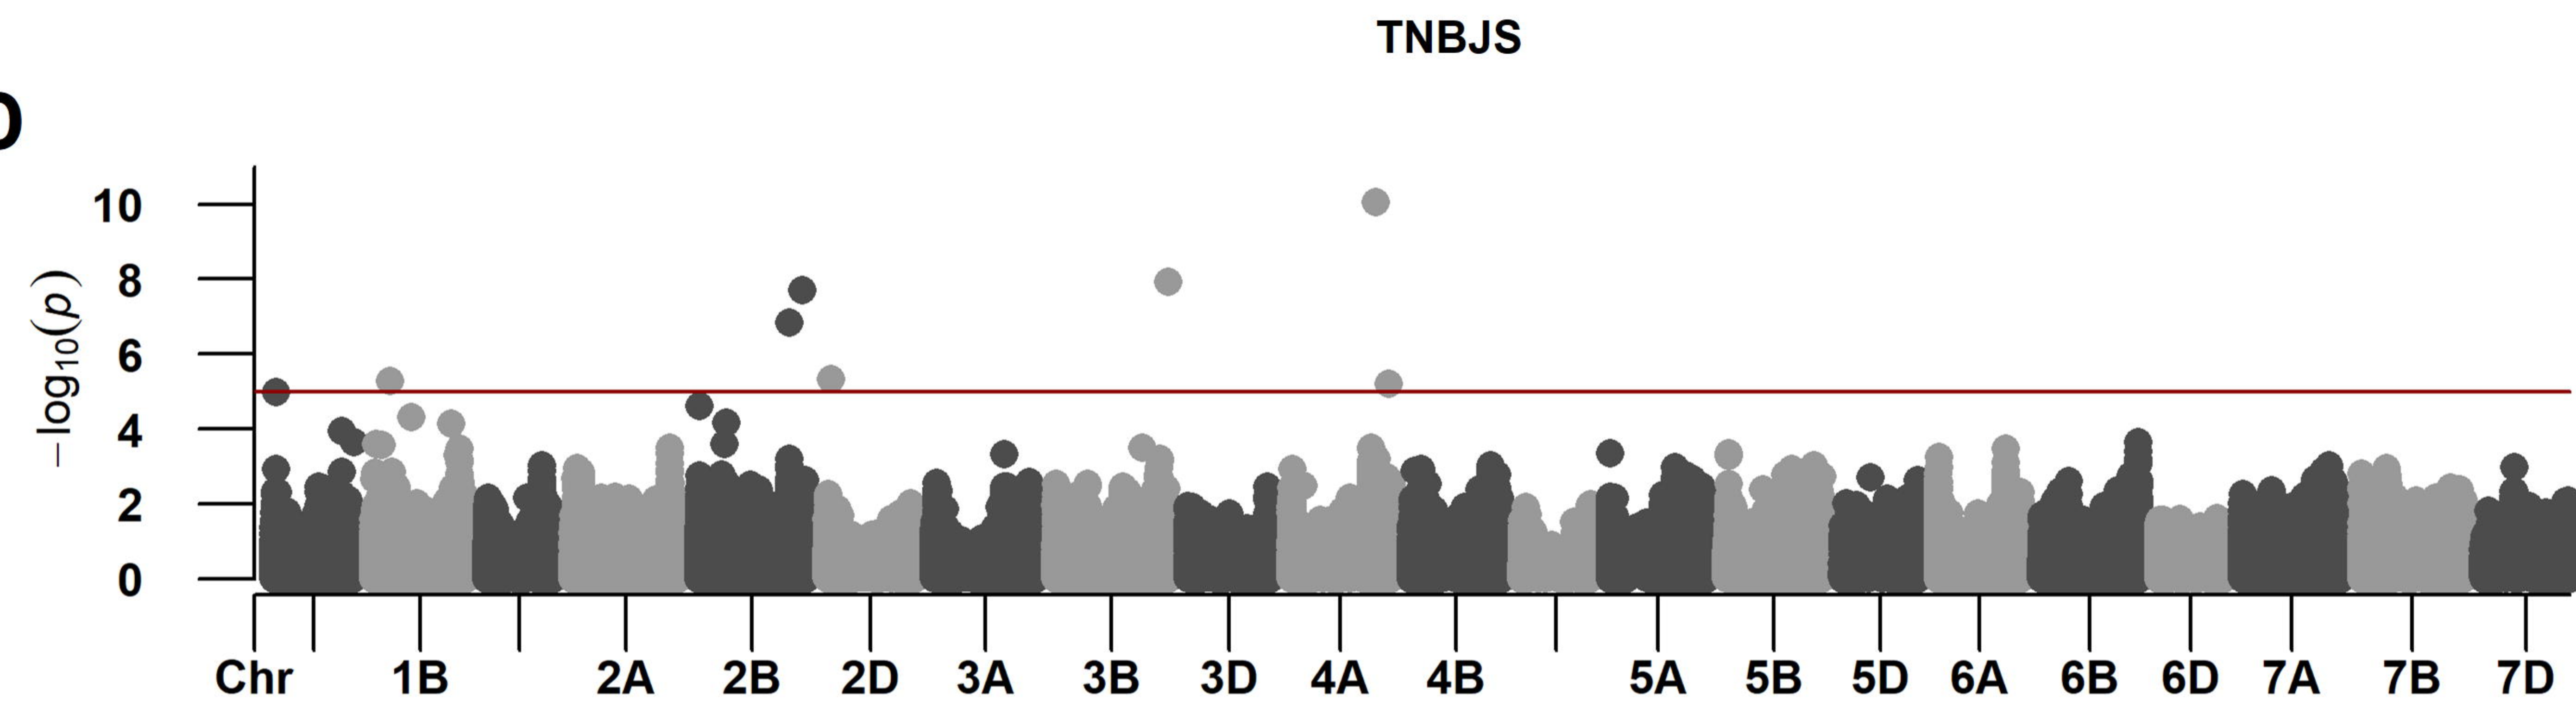

Source: https://www.biorxiv.org/content/10.1101/2022.11.10.515255v1.full.pdf
